# Supplementary material for: CuAAC-Based Synthesis, Copper-Catalyzed Aldehyde-Forming Hydrolytic Fission and Antiproliferative Evaluation of Novel Ferrocenoylamino-Substituted Triazole-Tethered Quinine–Chalcone Hybrids
Source: MDPI journal article supplement (doi:10.3390/molecules29020375), 2024-01-11

# CuAAC-Based Synthesis, Copper-Catalyzed Aldehyde-Forming Hydrolytic Fission and Antiproliferative Evaluation of Novel Ferrocenoylamino-Substituted Triazole-Tethered Quinine–Chalcone Hybrids

António Dembo <sup>1,2</sup>, Etelka Ferenczi <sup>1,2</sup>, Tamás Jernei <sup>1</sup>, Andrea Bor <sup>2</sup>, Zsuzsanna Schelz <sup>2</sup>, István Zupkó <sup>2</sup>, Szilárd Varga <sup>3</sup> and Antal Csámpai <sup>1,\*</sup>

<sup>1</sup> Department of Organic Chemistry, Eötvös Loránd University (ELTE), Pázmány P. sétány 1/A, H-1117 Budapest, Hungary; diandjungudembo2@gmail.com (A.D.); etelkaferenczi@gmail.com (E.F.); tamas.jernei@ttk.elte.hu (T.J.)

<sup>2</sup> Hevesy György PhD School of Chemistry, Pázmány P. sétány 1/A, H-1117 Budapest, Hungary; bor.gytk@gmail.com (A.B.); schelz.zsuzsanna@szte.hu (Z.S.); zupko.istvan@szte.hu (I.Z.)

<sup>3</sup> Institute of Pharmacodynamics and Biopharmacy, University of Szeged, Eötvös u. 6., H-6720 Szeged, Hungary; varga.szilard@ttk.hu

<sup>4</sup> HUN-REN Research Centre for Natural Sciences, Institute of Organic Chemistry, Magyar Tudósok Krt 2., H-1117 Budapest, Hungary

\* Correspondence: antal.csampai@ttk.elte.hu; Tel.: +36-01-372-2500 (ext. 6591)

## Supporting Information

### Table of content

|          |                                                       |          |
|----------|-------------------------------------------------------|----------|
| <b>1</b> | <b>Copies of NMR spectra.....</b>                     | <b>2</b> |
| 1.1      | <i>NMR spectra of novel alkyne precursors.....</i>    | <i>2</i> |
| 1.2      | <i>NMR spectra of the novel hybrid compounds.....</i> | <i>5</i> |

## 1 Copies of NMR spectra

### 1.1 NMR spectra of the novel alkyne precursors

$^1\text{H}$ -NMR of **6/A** (500 MHz,  $\text{DMSO-d}_6$ )

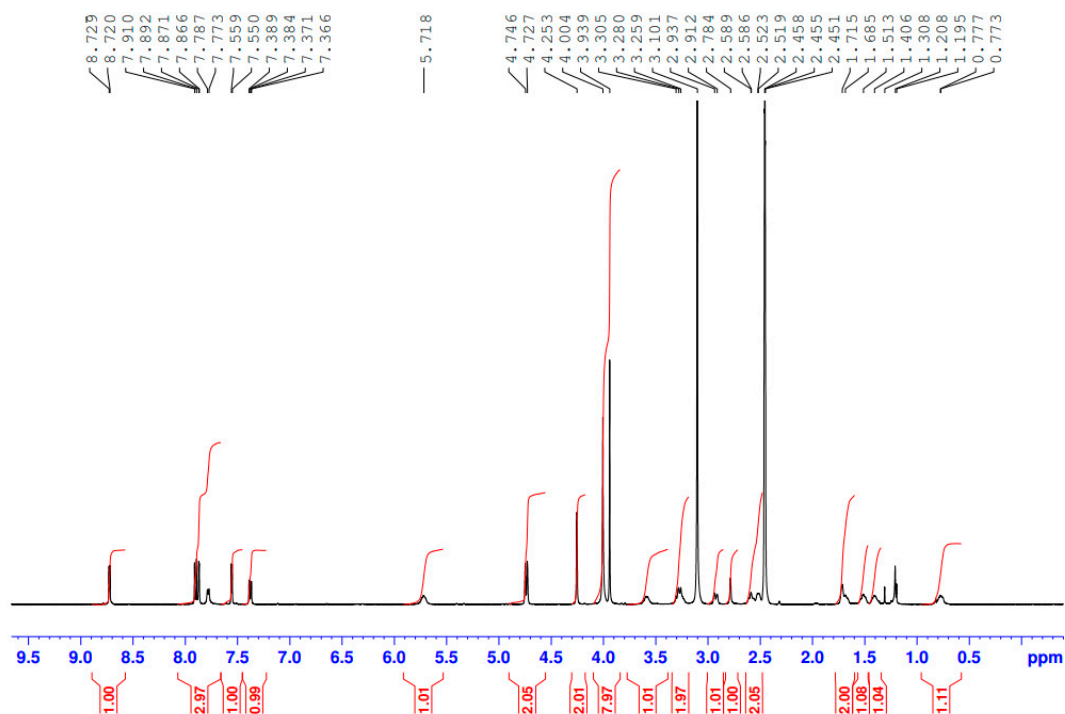

$^{13}\text{C}$ -NMR of **6/A** (125 MHz,  $\text{DMSO-d}_6$ )

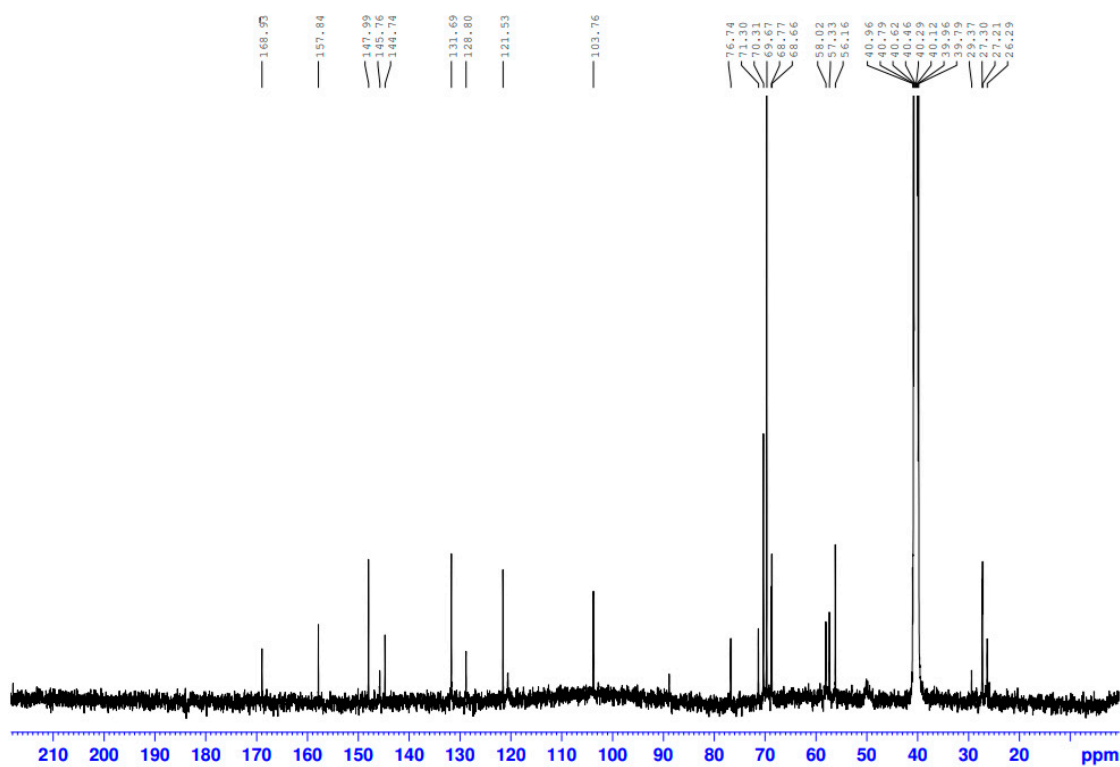

$^1\text{H}$ - $^{13}\text{C}$ -HSQC of 6/A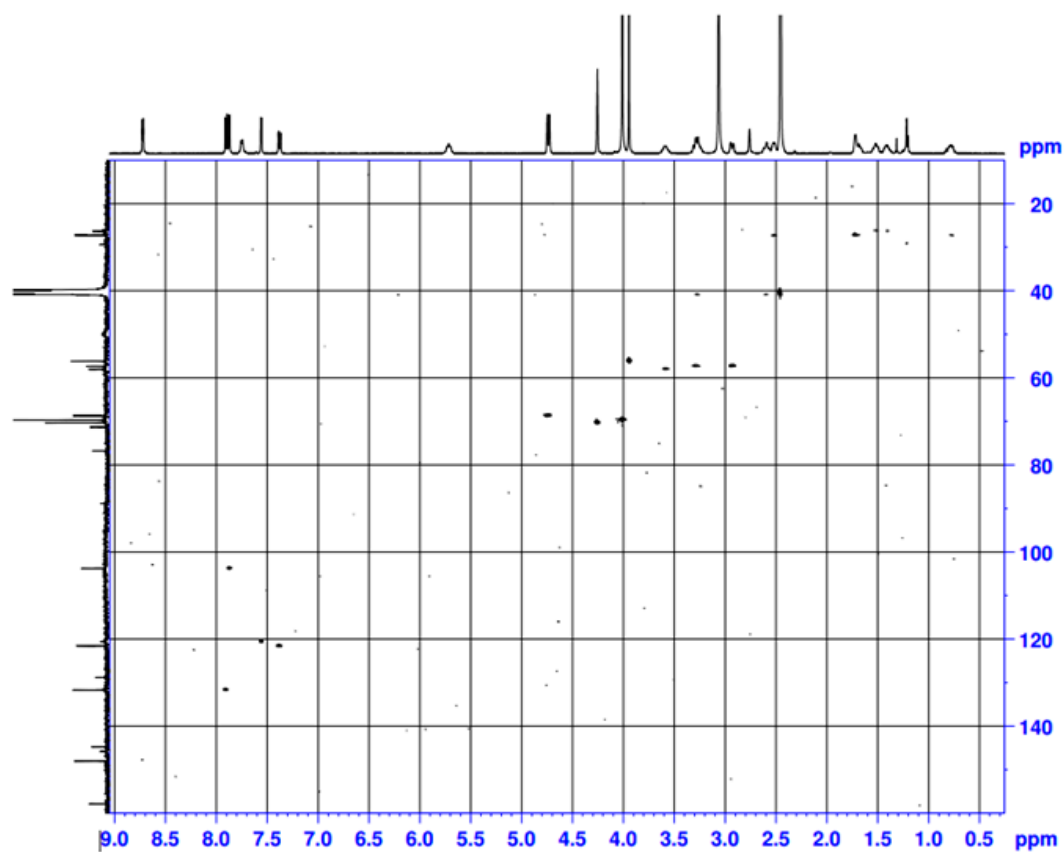 $^1\text{H}$ -NMR of 6/B (500 MHz, DMSO- $d_6$ )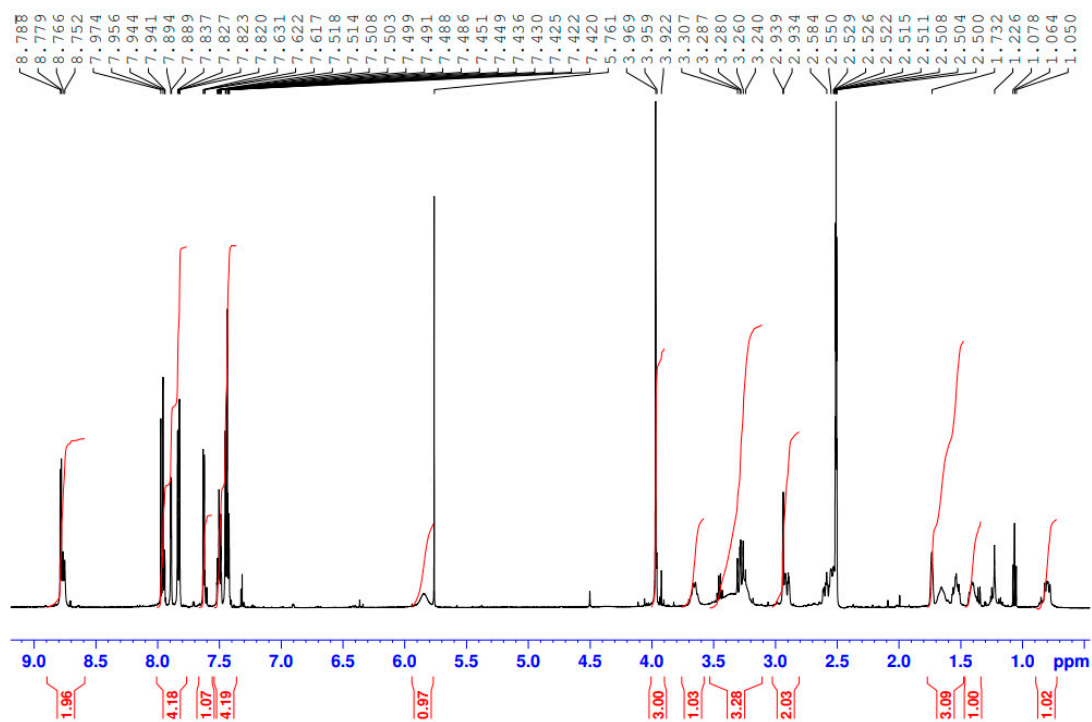

$^{13}\text{C}$ -NMR of **6/B** (125 MHz, DMSO- $d_6$ )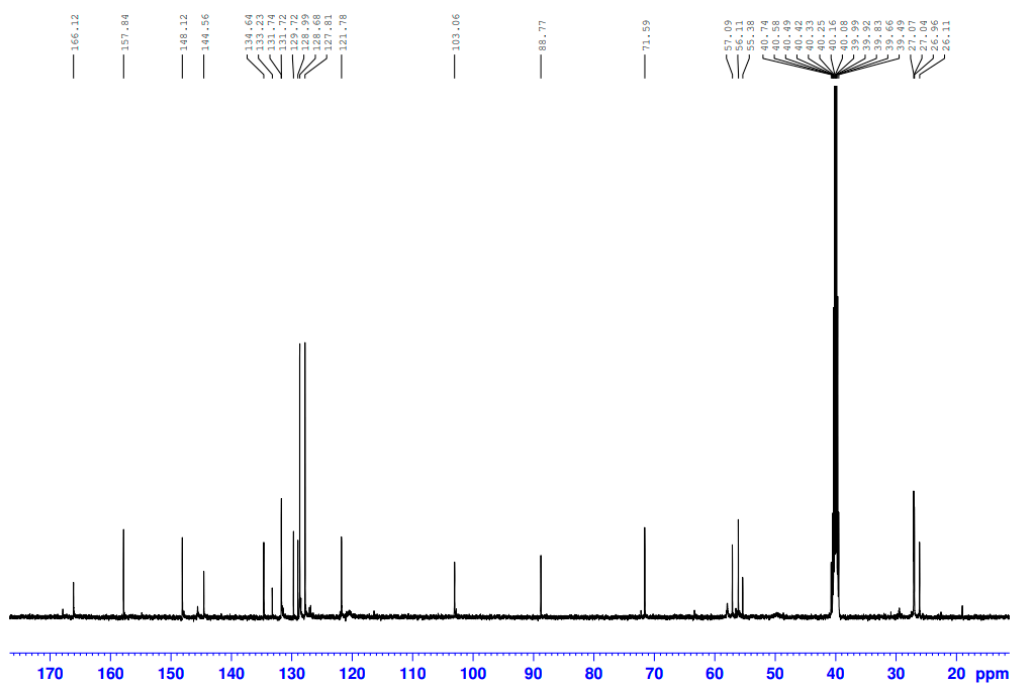 $^1\text{H}$ - $^{13}\text{C}$ -HSQC of **6/B**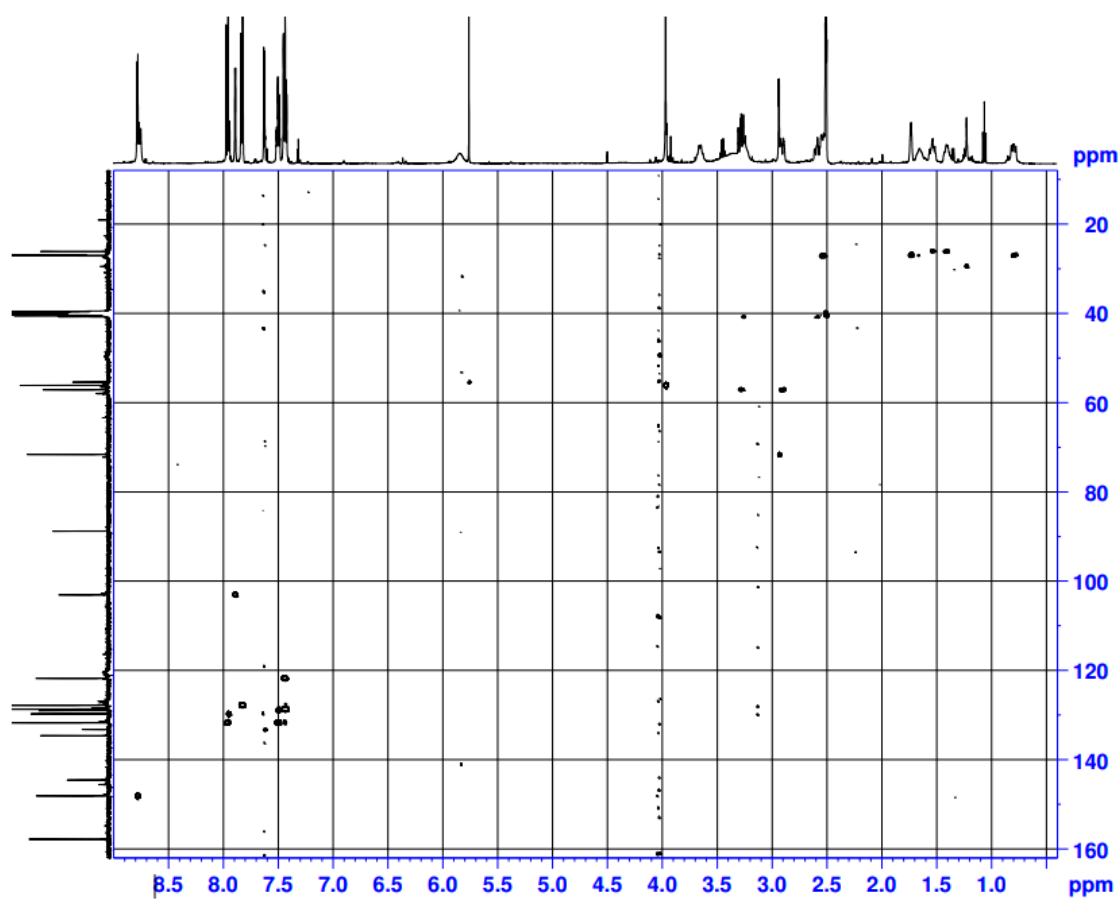

## 1.2 NMR spectra of the targeted hybrid compounds

 $^1\text{H}$ -NMR of **7a/A** (500 MHz, DMSO- $d_6$ )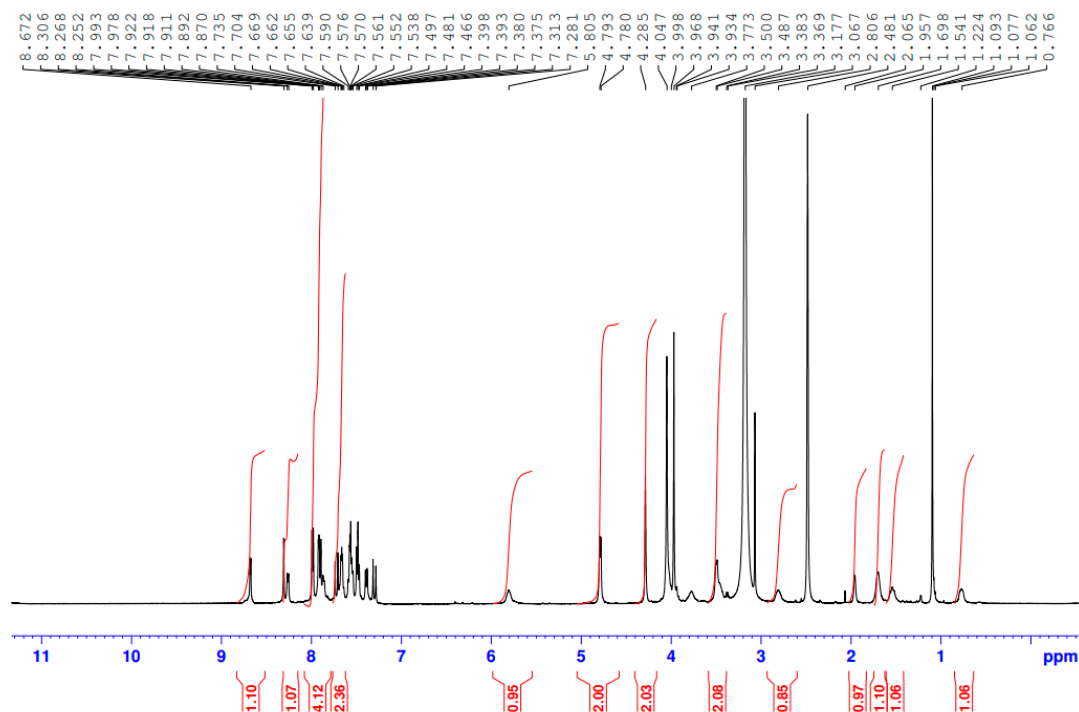 $^{13}\text{C}$ -NMR of **7a/A** (125 MHz, DMSO- $d_6$ )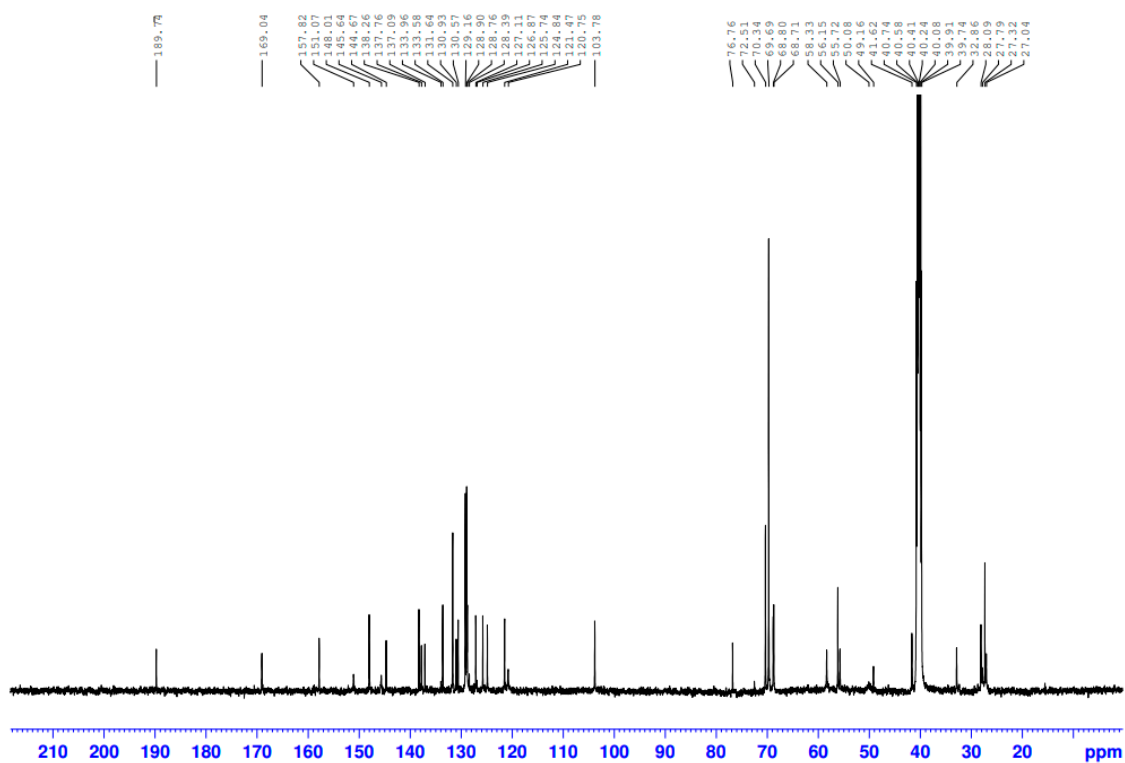

$^1\text{H}$ - $^{13}\text{C}$ -HSQC of **7a/A**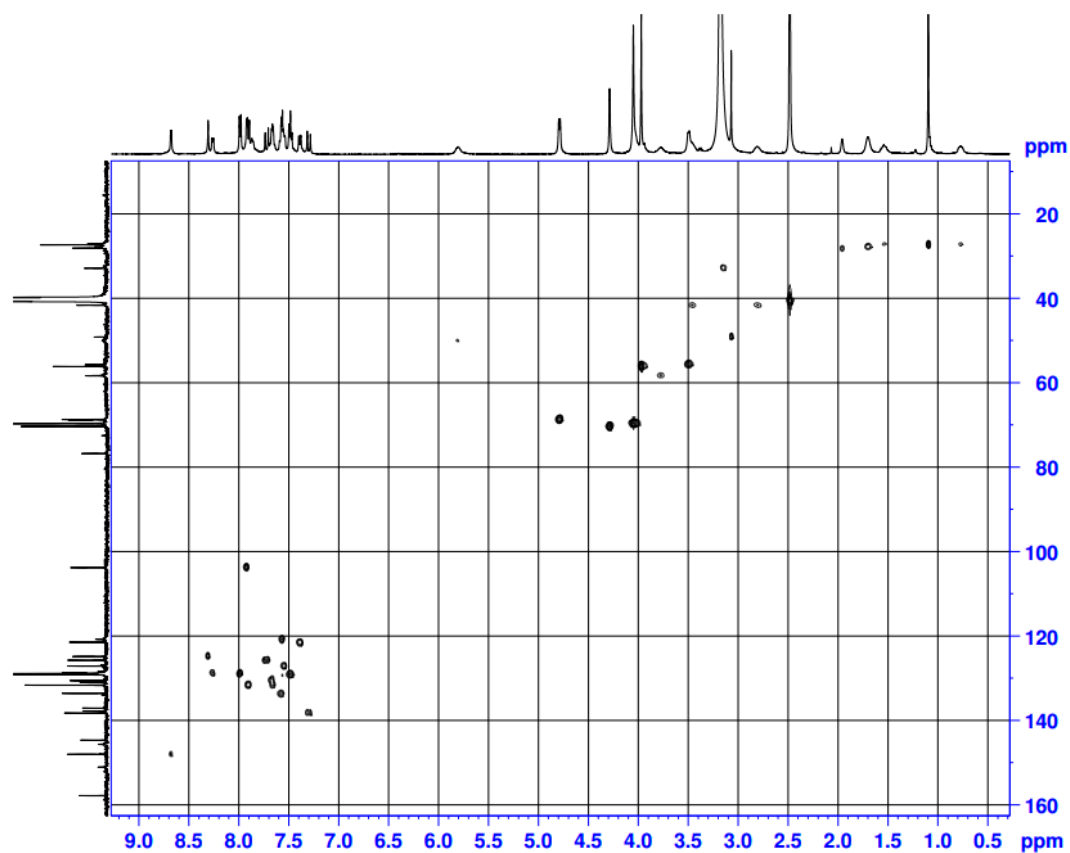 $^1\text{H}$ -NMR of **7b/A** (500 MHz,  $\text{DMSO-d}_6$ )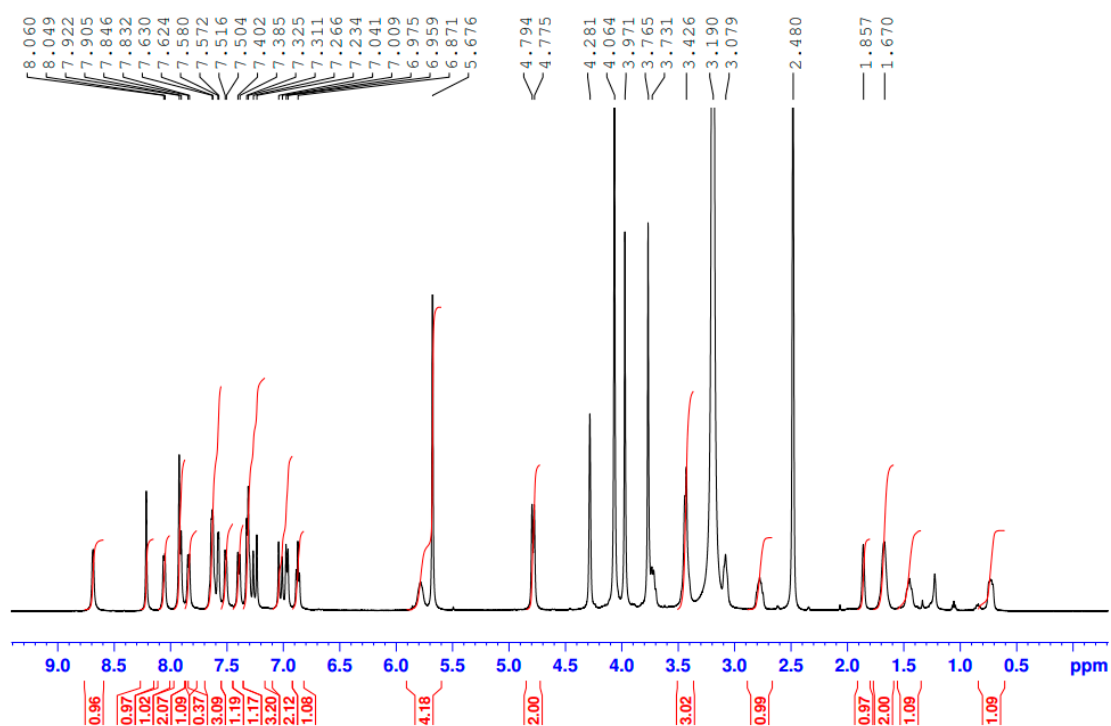

$^{13}\text{C}$ -NMR of **7b/A** (125 MHz, DMSO- $d_6$ )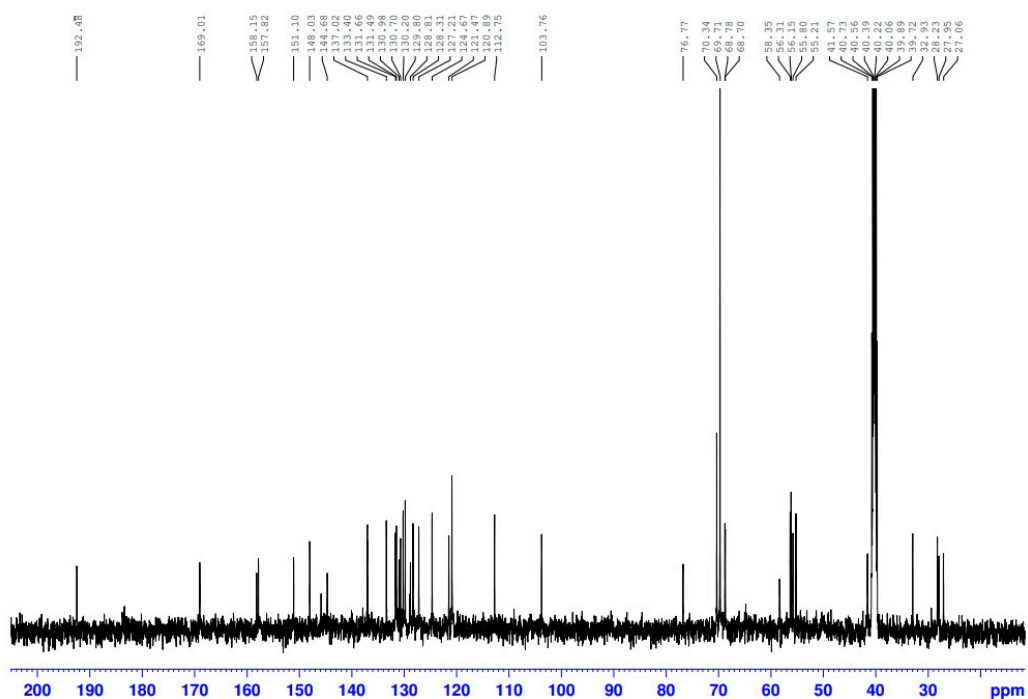 $^1\text{H}$ - $^{13}\text{C}$ -HSQC of **7b/A**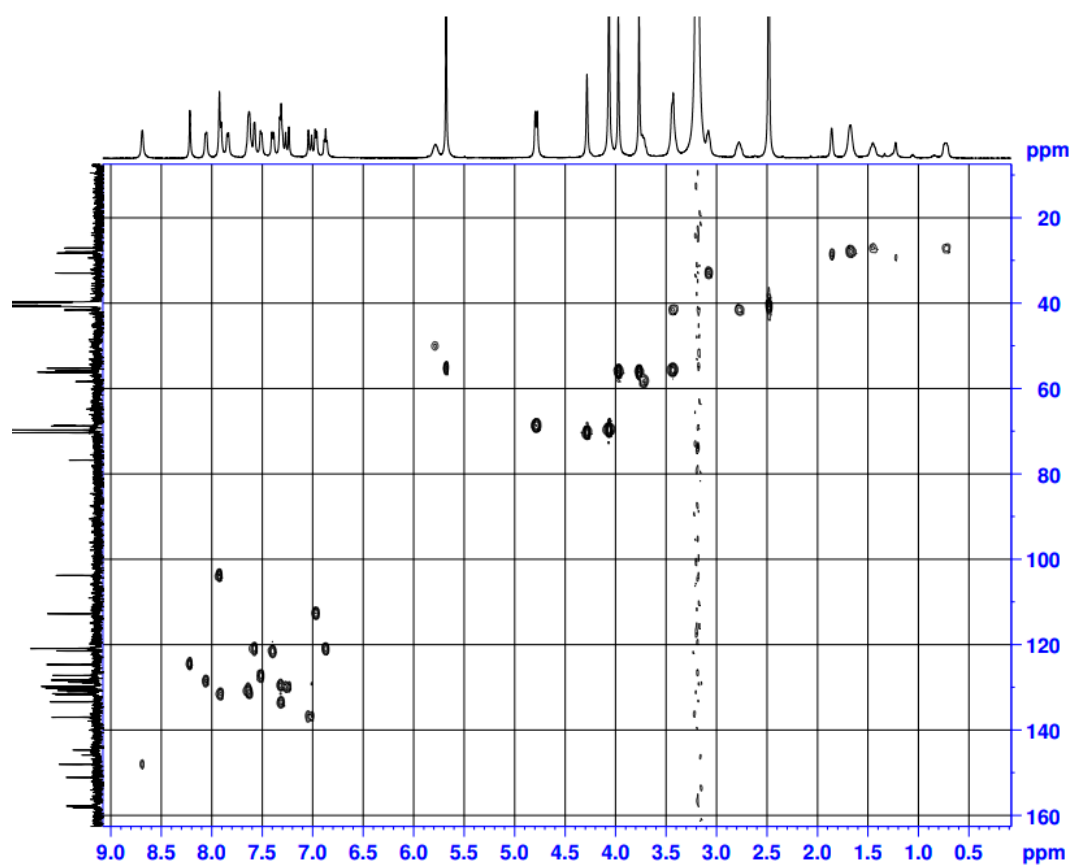

$^1\text{H}$ - $^{13}\text{C}$ -HMBC of **7b/A**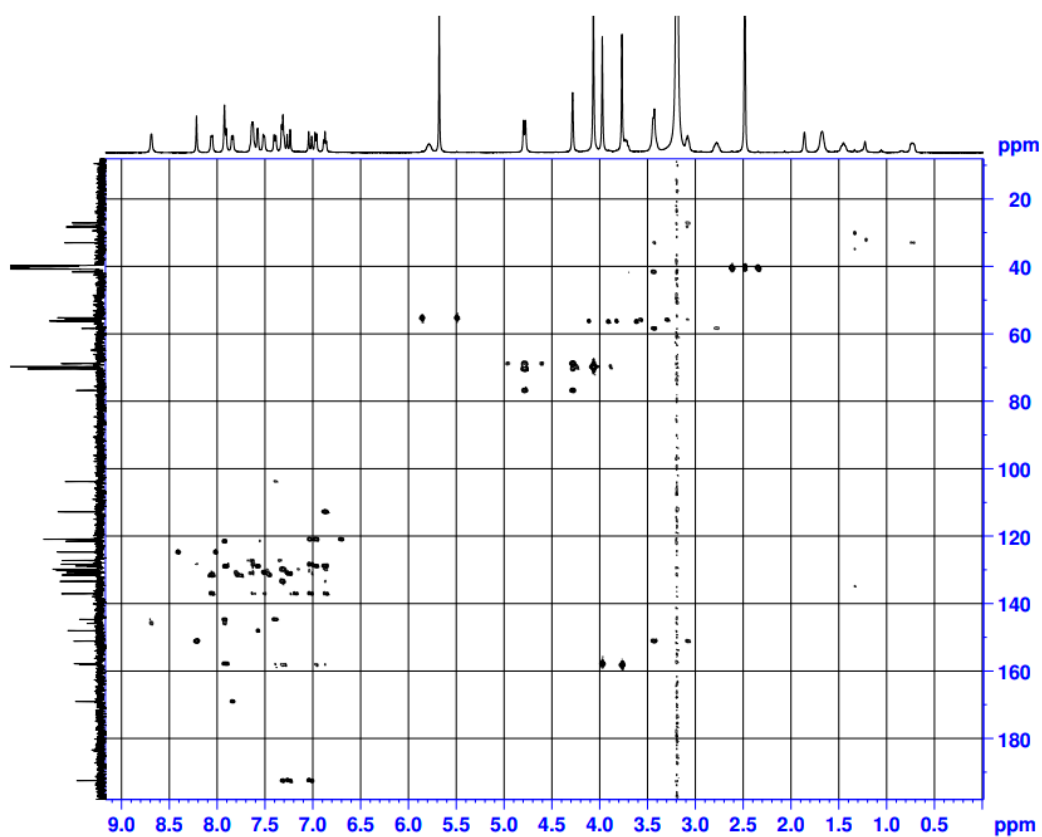 $^1\text{H}$ -NMR of **7c/A** (500 MHz, DMSO- $d_6$ )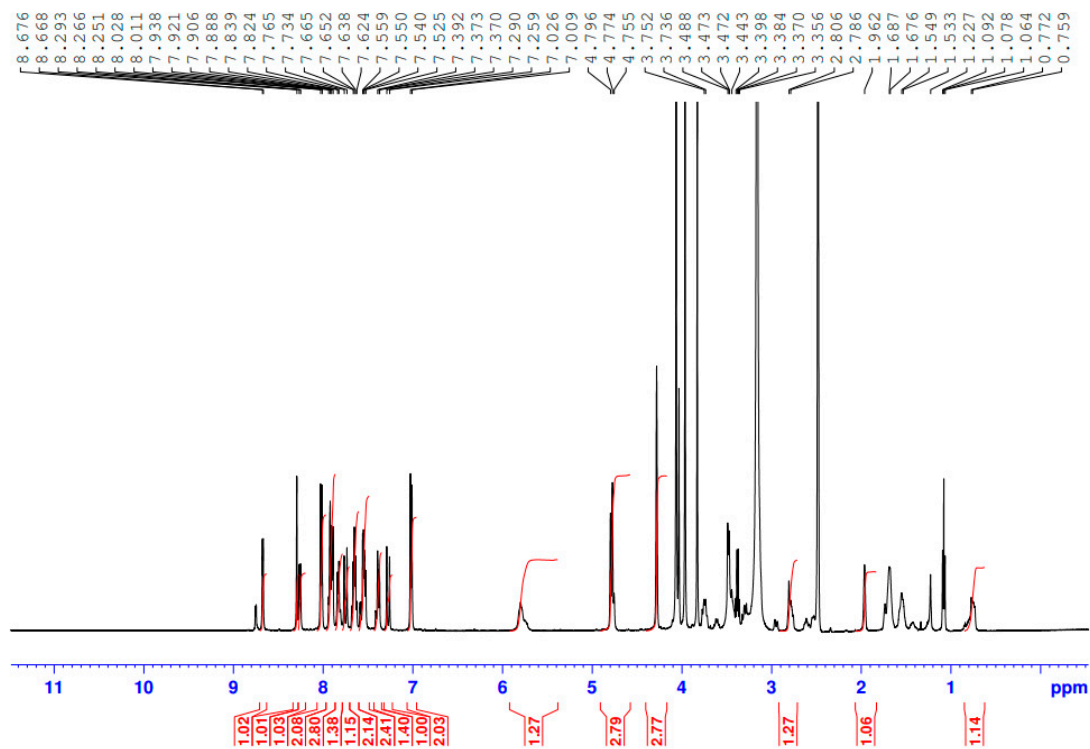

$^{13}\text{C}$ -NMR of **7c/A** (125 MHz, DMSO- $d_6$ )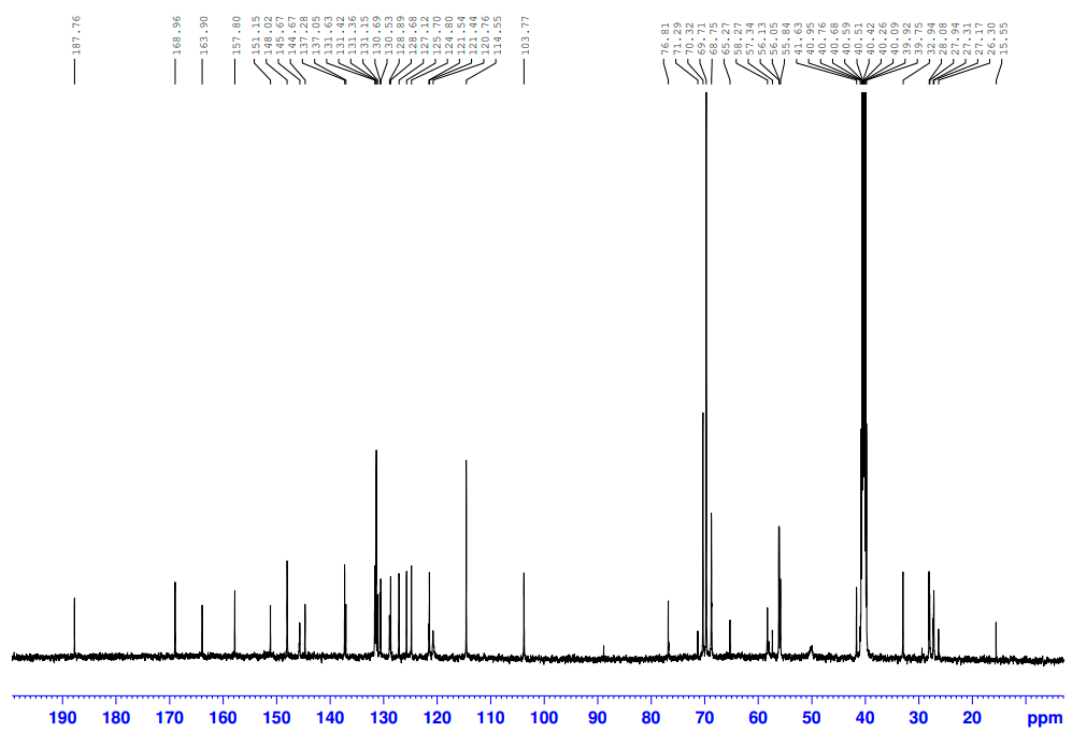 $^1\text{H}$ - $^{13}\text{C}$ -HSQC of **7c/A**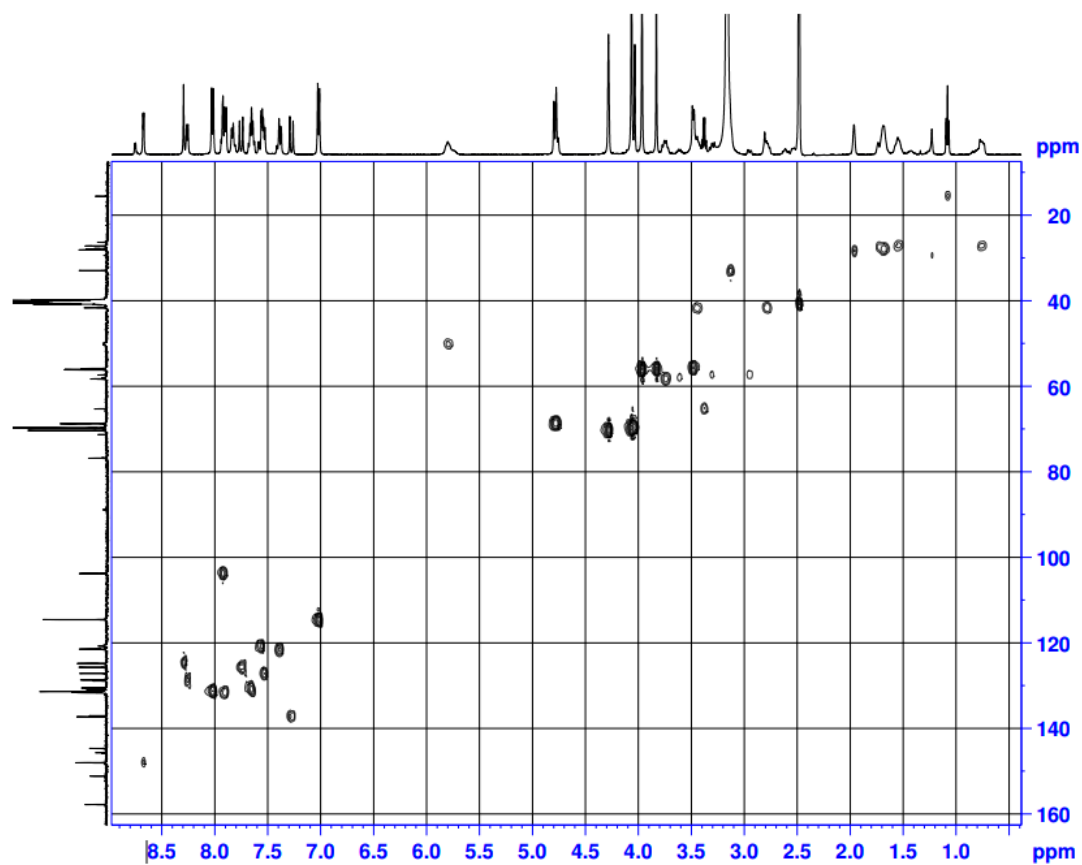

$^1\text{H}$ - $^{13}\text{C}$ -HMBC of **7c/A**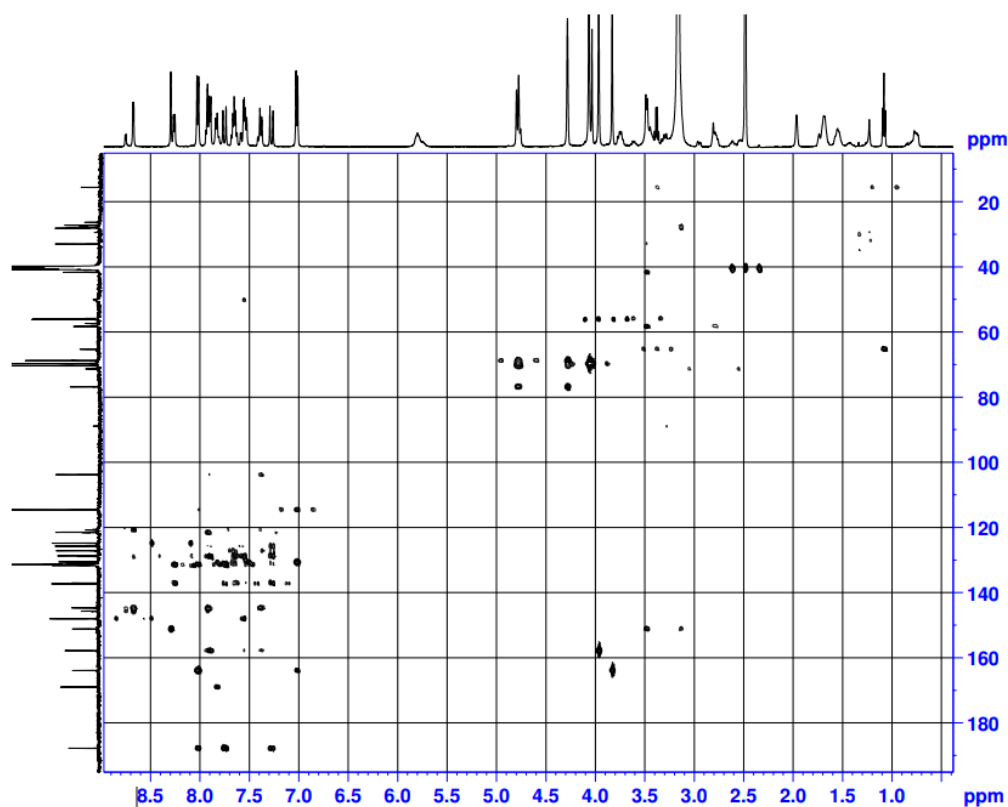 $^1\text{H}$ -NMR of **7e/A** (500 MHz, DMSO- $d_6$ )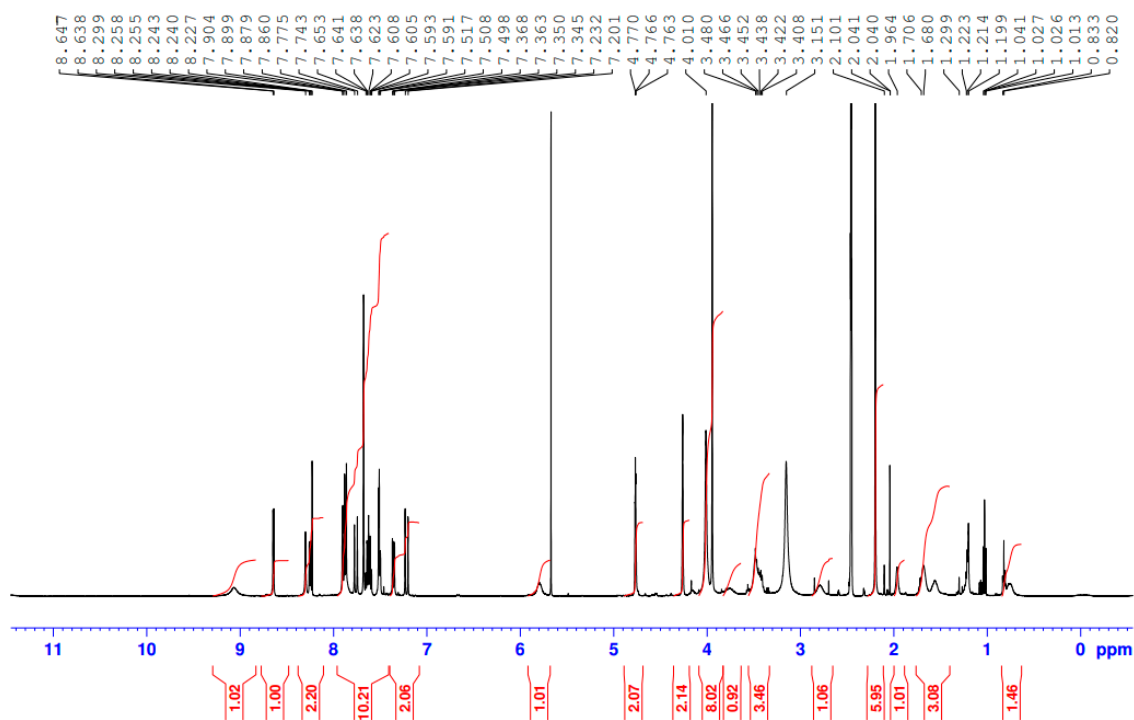

$^{13}\text{C}$ -NMR of **7e/A** (125 MHz, DMSO- $d_6$ )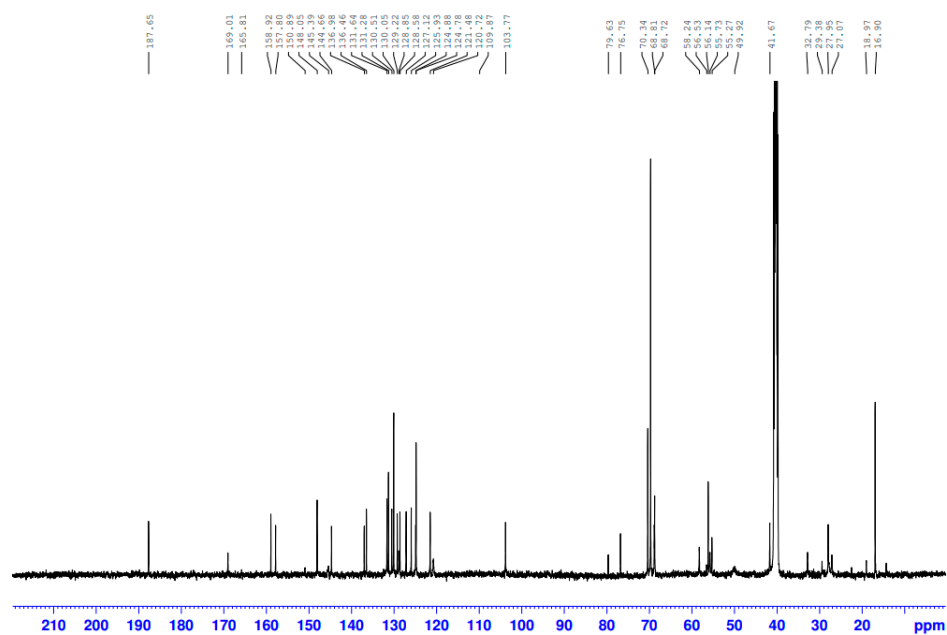 $^1\text{H}$ - $^{13}\text{C}$ -HSQC of **7e/A**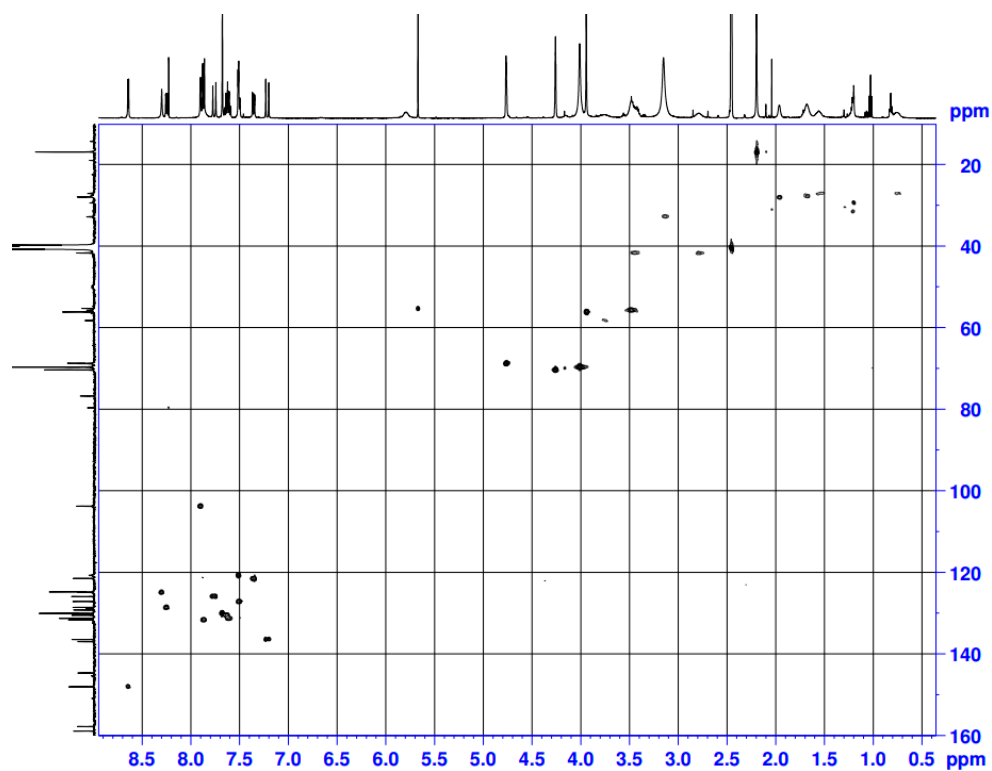

$^1\text{H}$ - $^{13}\text{C}$ -HMBC of **7e/A**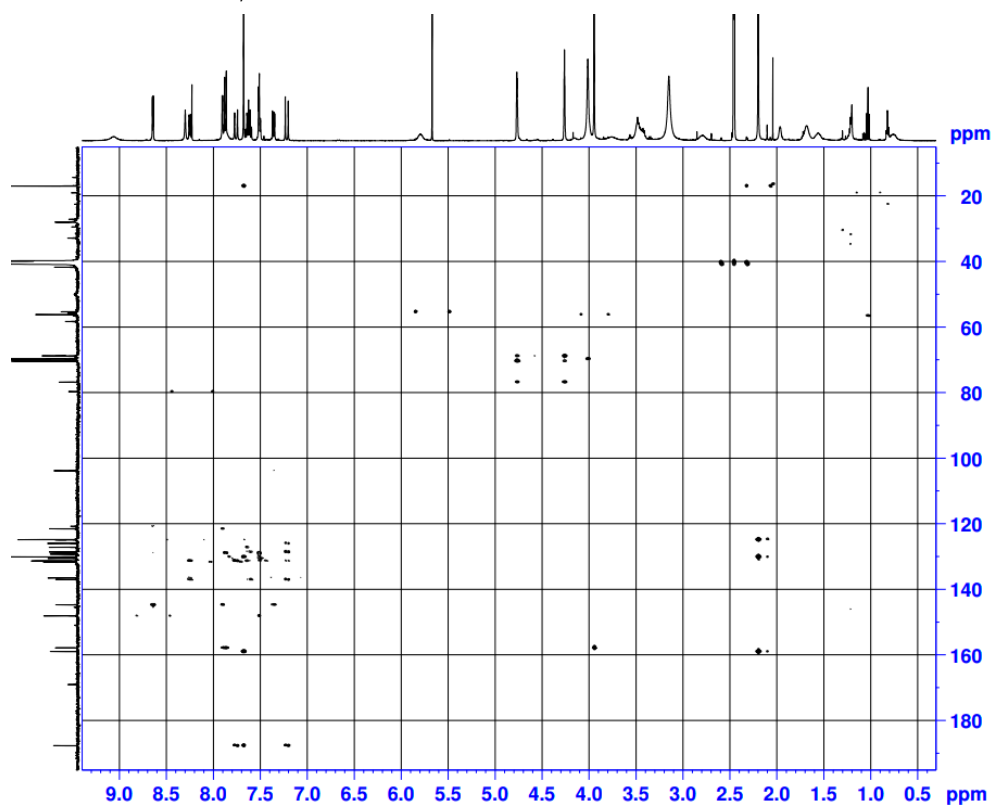 $^1\text{H}$ -NMR of **9b/A** (500 MHz,  $\text{DMSO-d}_6$ )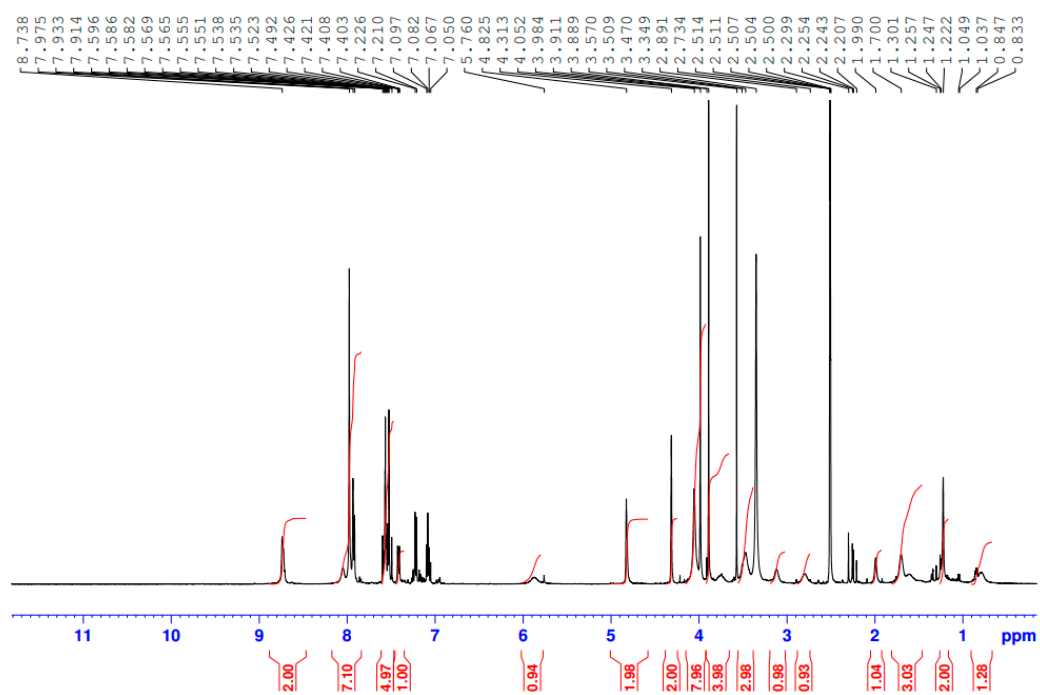

$^{13}\text{C}$ -NMR of **9b/A** (125 MHz, DMSO- $d_6$ )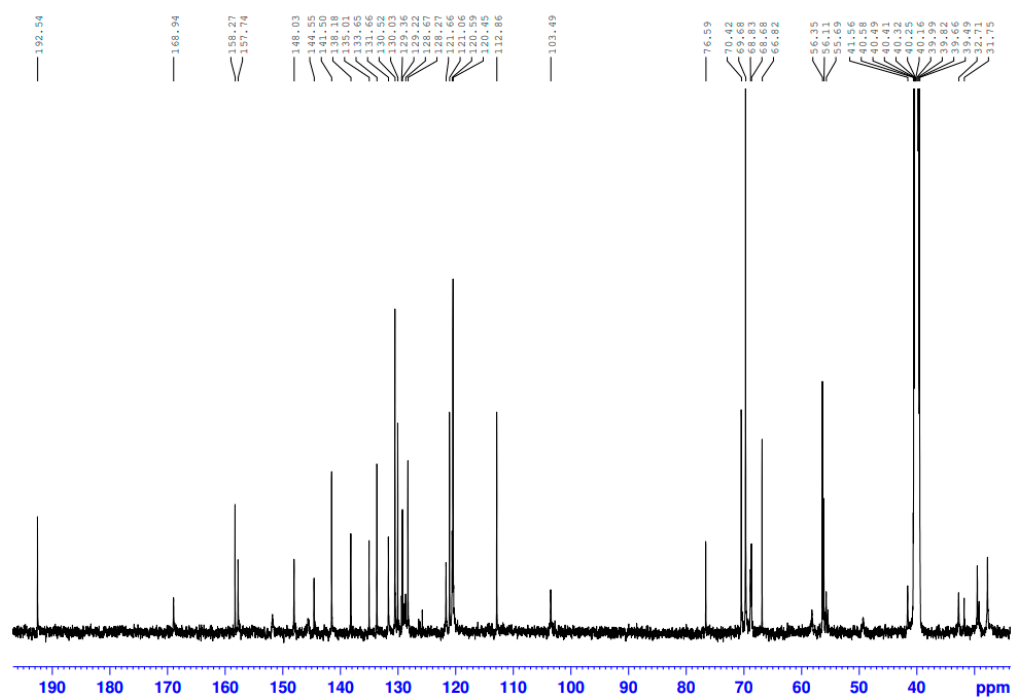 $^1\text{H}$ - $^{13}\text{C}$ -HMBC of **9b/A**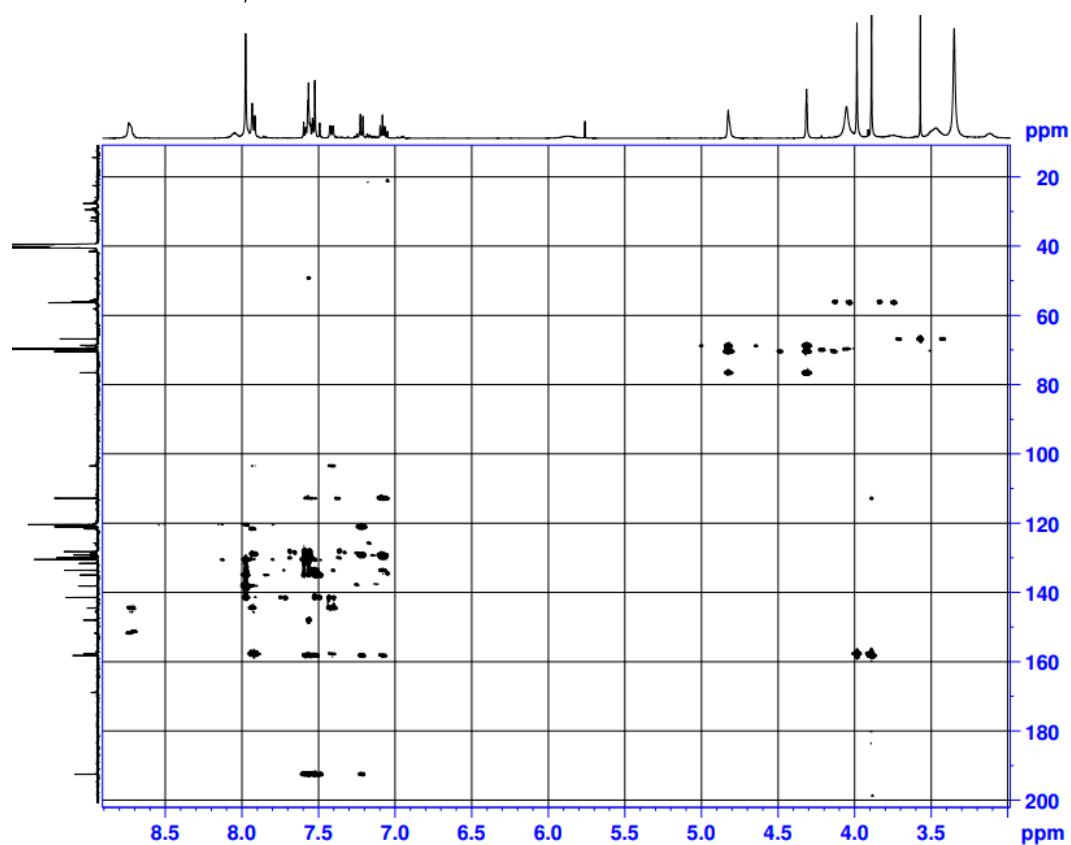

$^1\text{H}$ -NMR of **9c/A** (500 MHz,  $\text{DMSO-d}_6$ )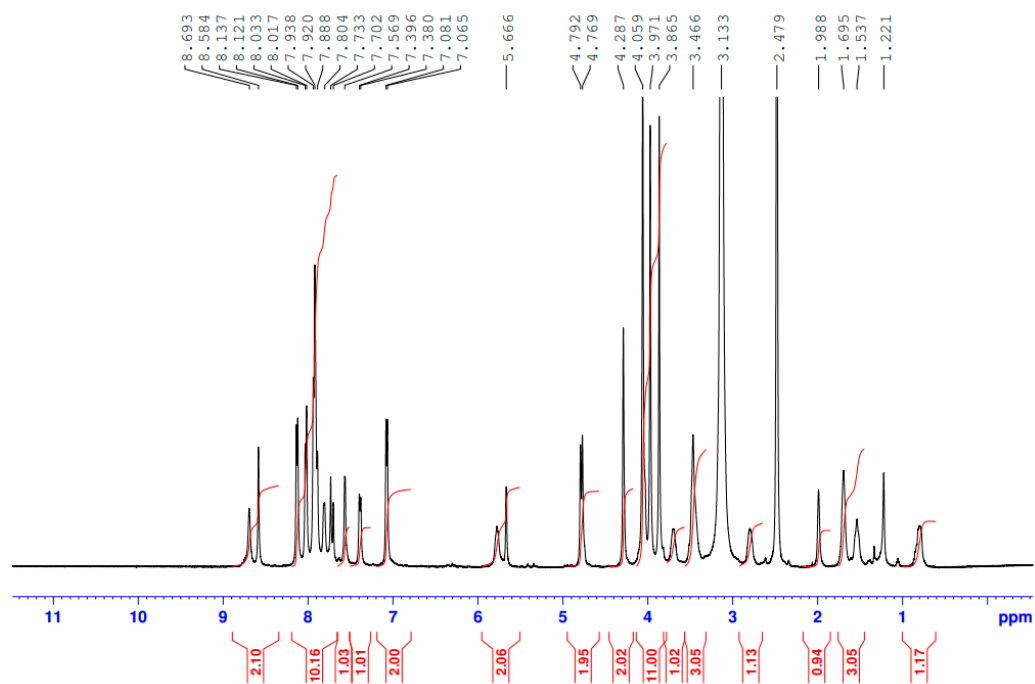 $^{13}\text{C}$ -NMR of **9c/A** (125 MHz,  $\text{DMSO-d}_6$ )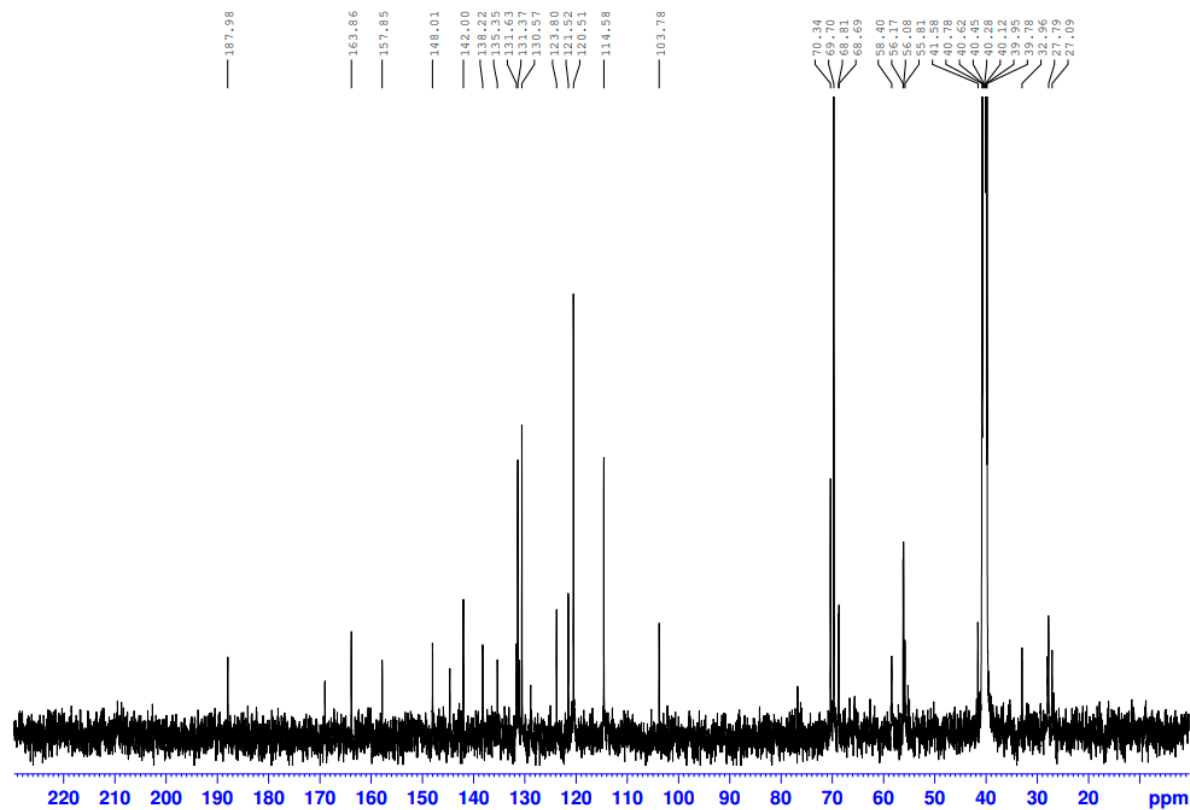

$^1\text{H}$ - $^{13}\text{C}$ -HSQC of **9c/A**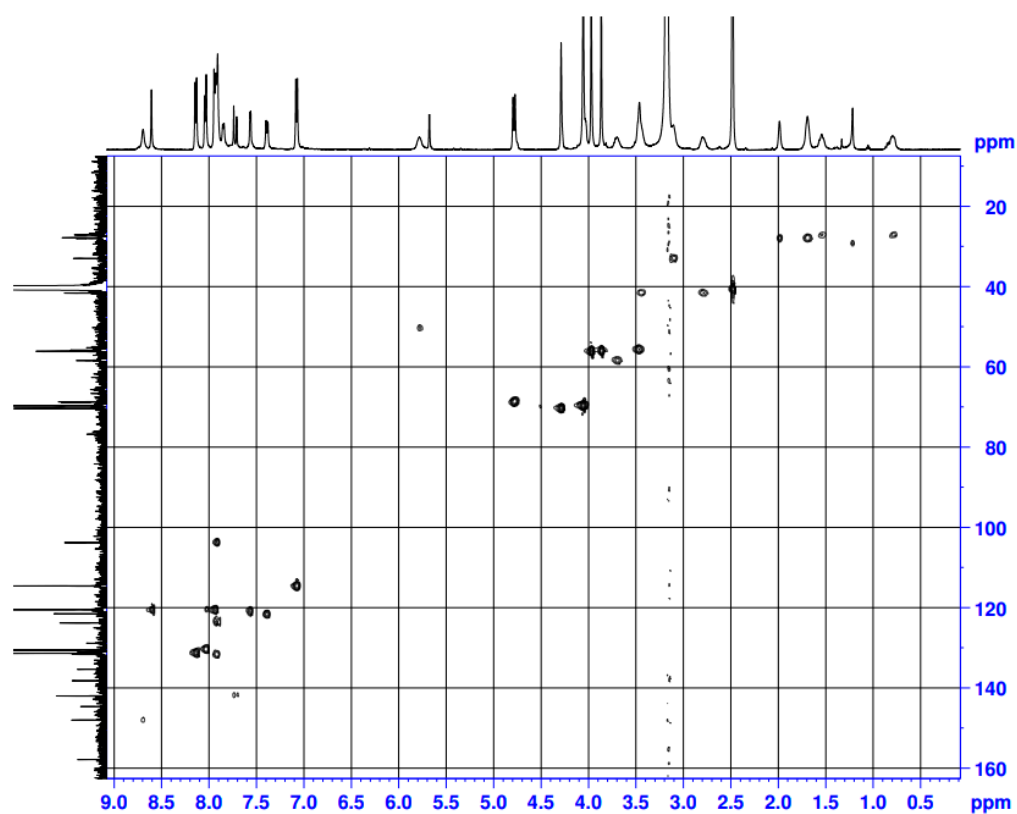 $^1\text{H}$ - $^{13}\text{C}$ -HMBC of **9c/A**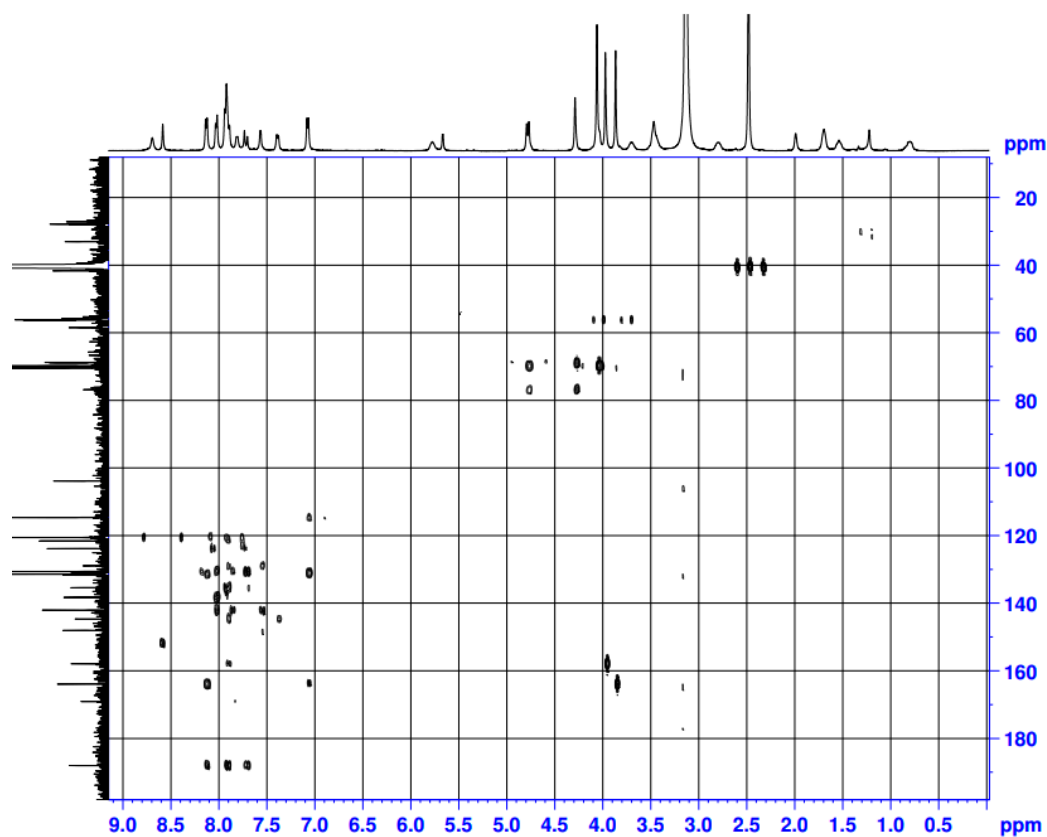

$^1\text{H}$ -NMR of **9d/A** (500 MHz, DMSO- $d_6$ )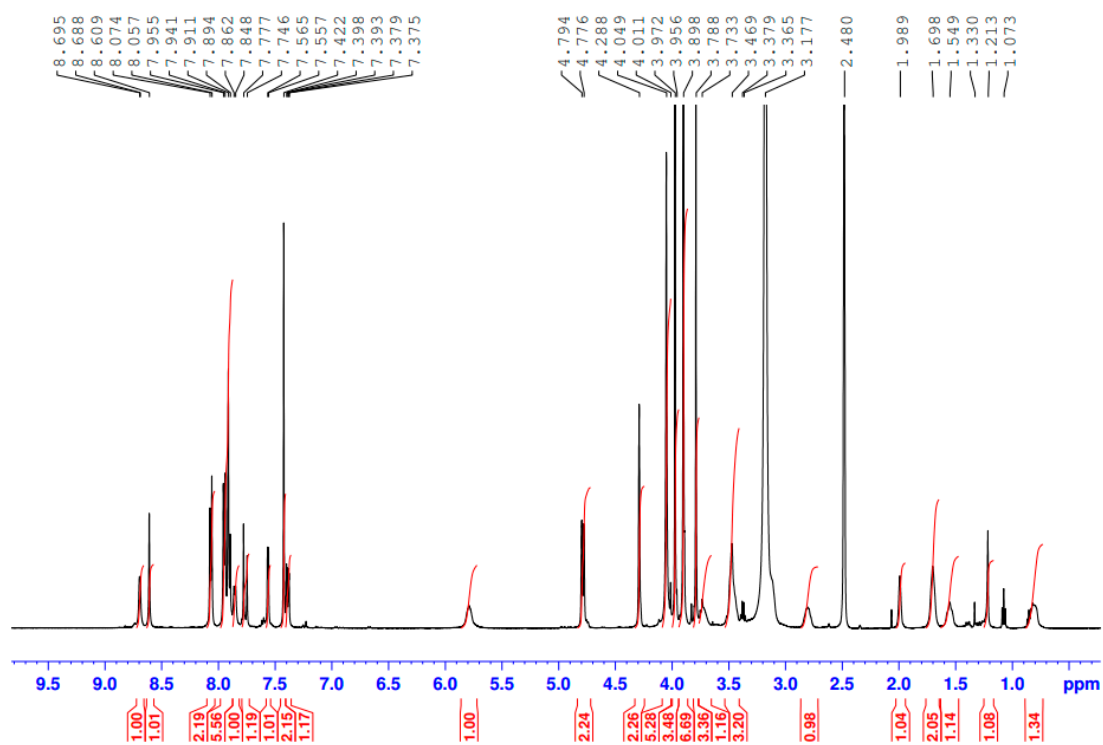 $^{13}\text{C}$ -NMR of **9d/A** (125 MHz, DMSO- $d_6$ )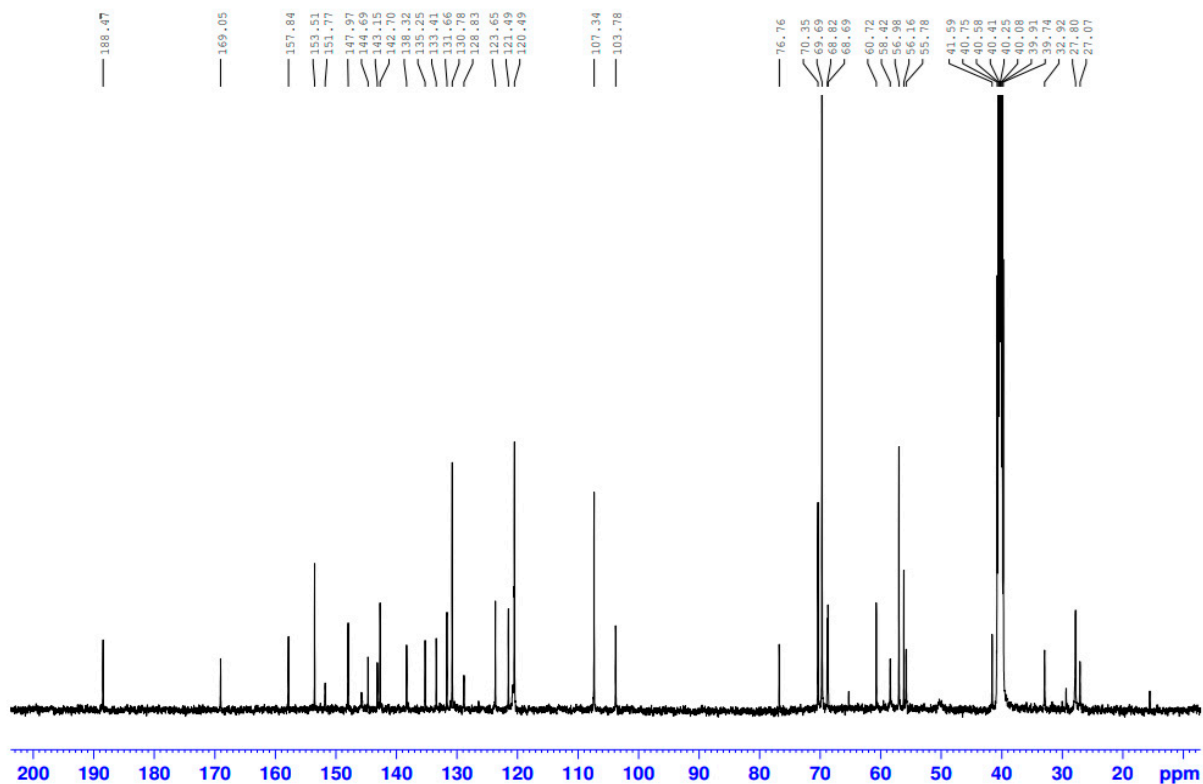

$^1\text{H}$ - $^{13}\text{C}$ -HSQC of **9d/A**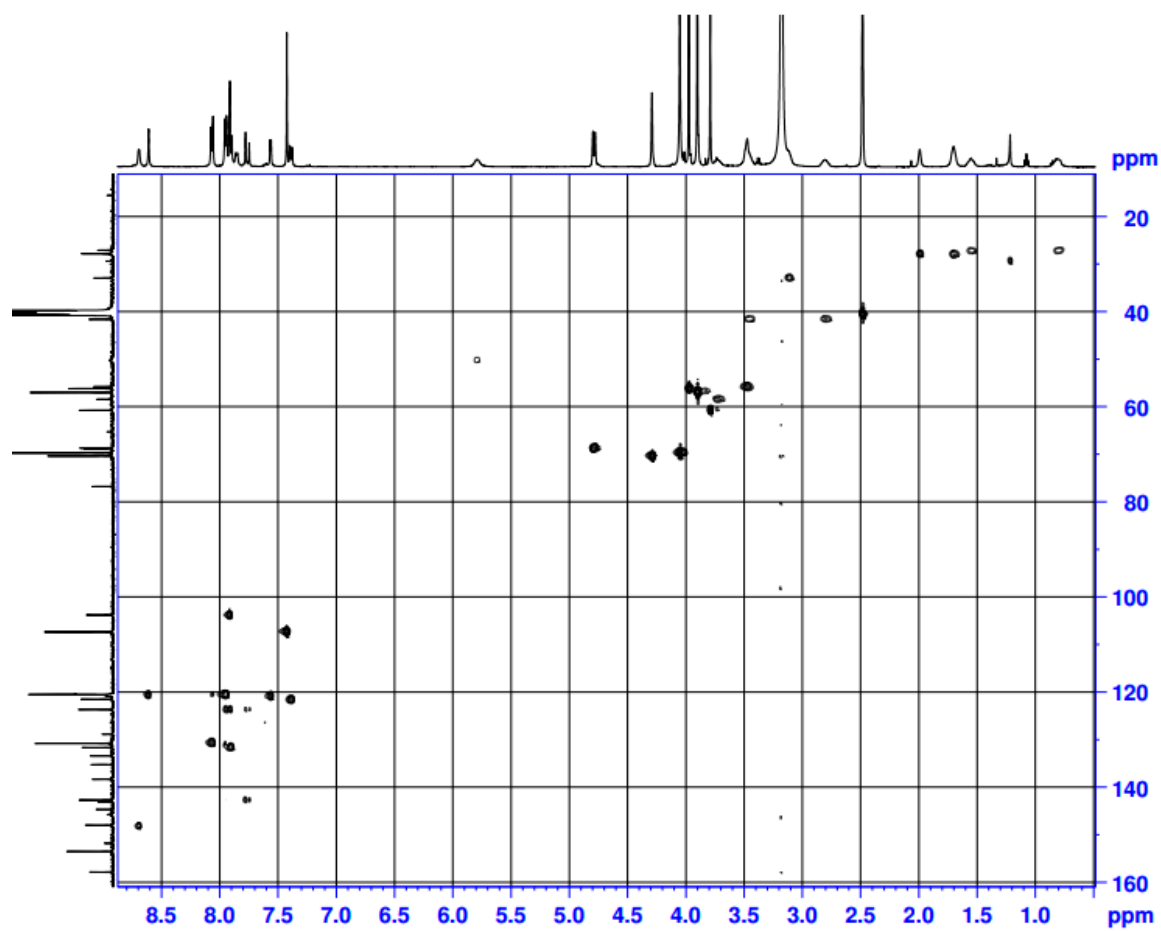

$^1\text{H}$ - $^{13}\text{C}$ -HMBC of **9d/A**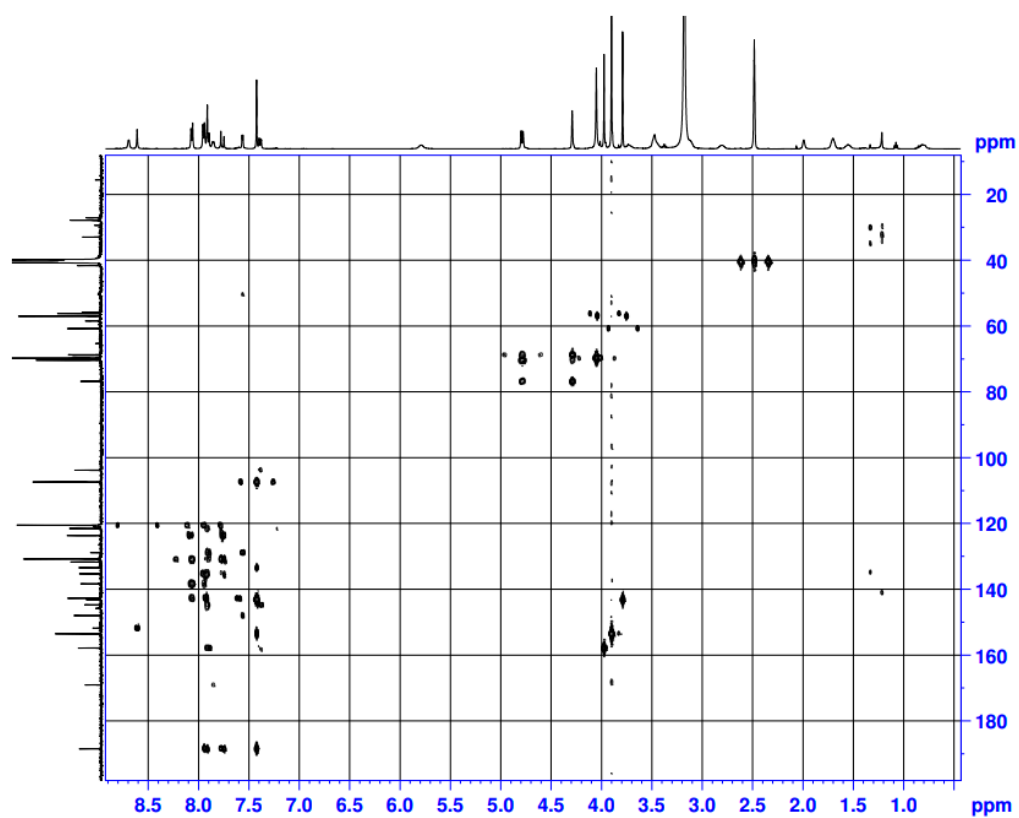NOESY of **9d/A** (500 MHz, DMSO- $d_6$ )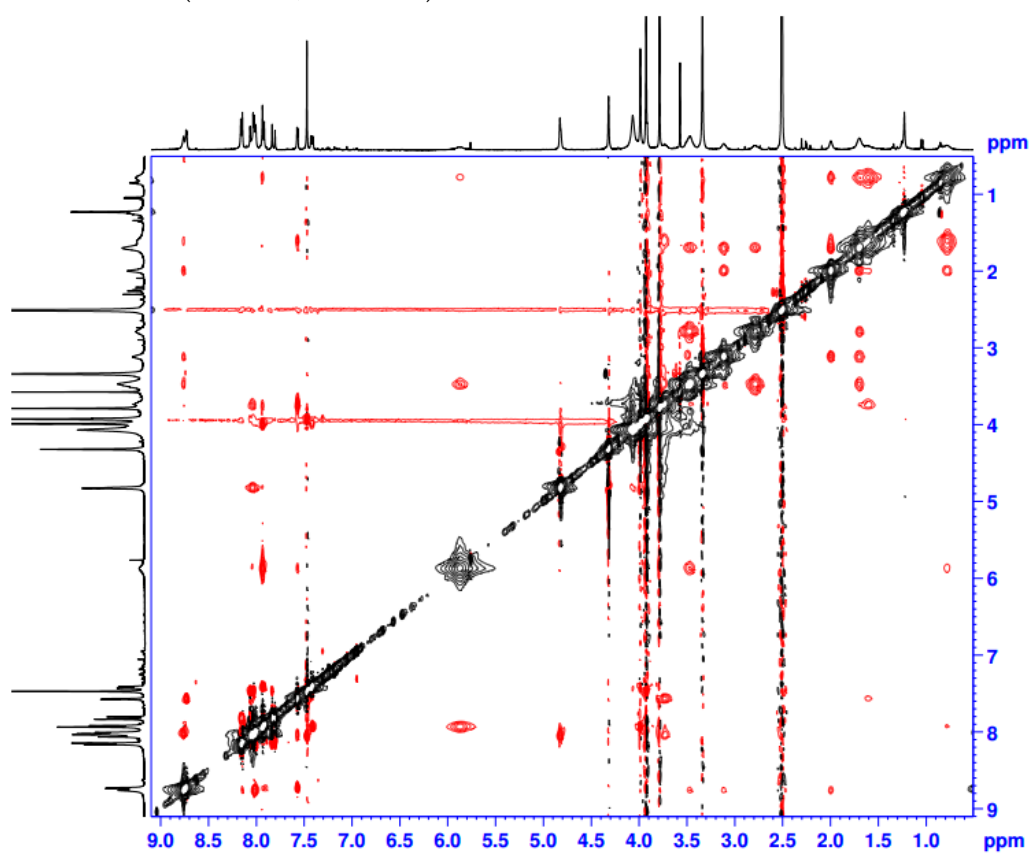

$^1\text{H}$ -NMR of **7e/B** (500 MHz, DMSO- $d_6$ )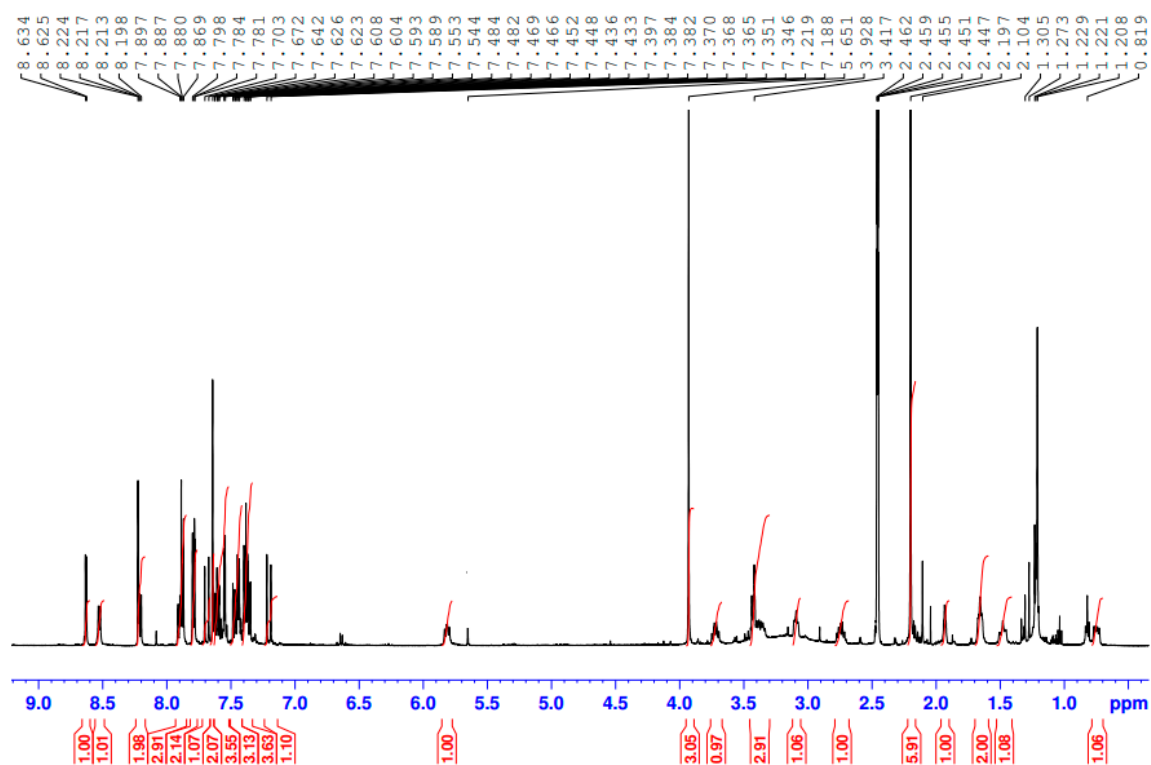 $^{13}\text{C}$ -NMR of **7e/B** (125 MHz, DMSO- $d_6$ )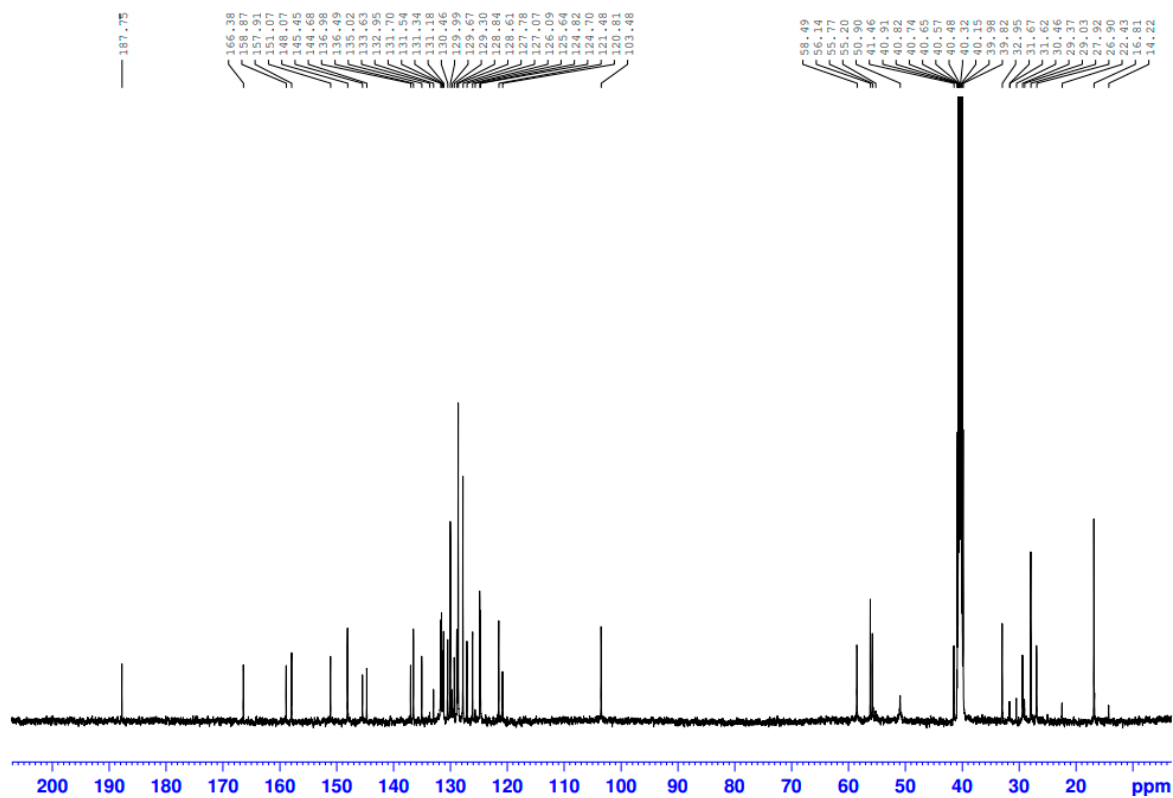

$^1\text{H}$ - $^{13}\text{C}$ -HSQC of **7e/B**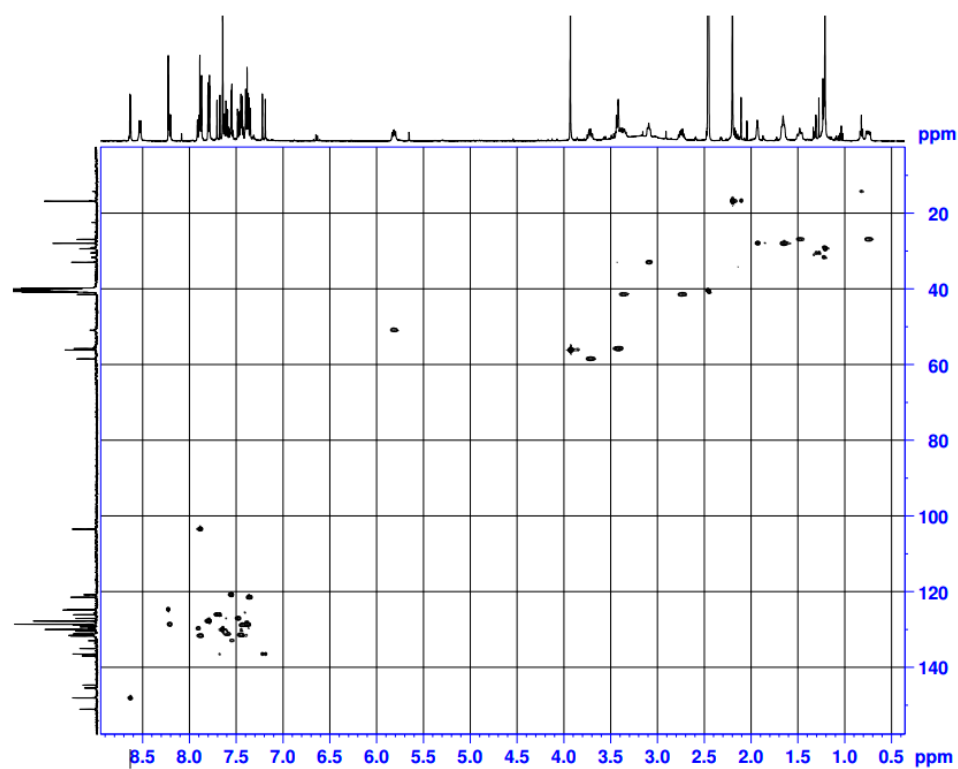 $^1\text{H}$ - $^{13}\text{C}$ -HMBC of **7e/B**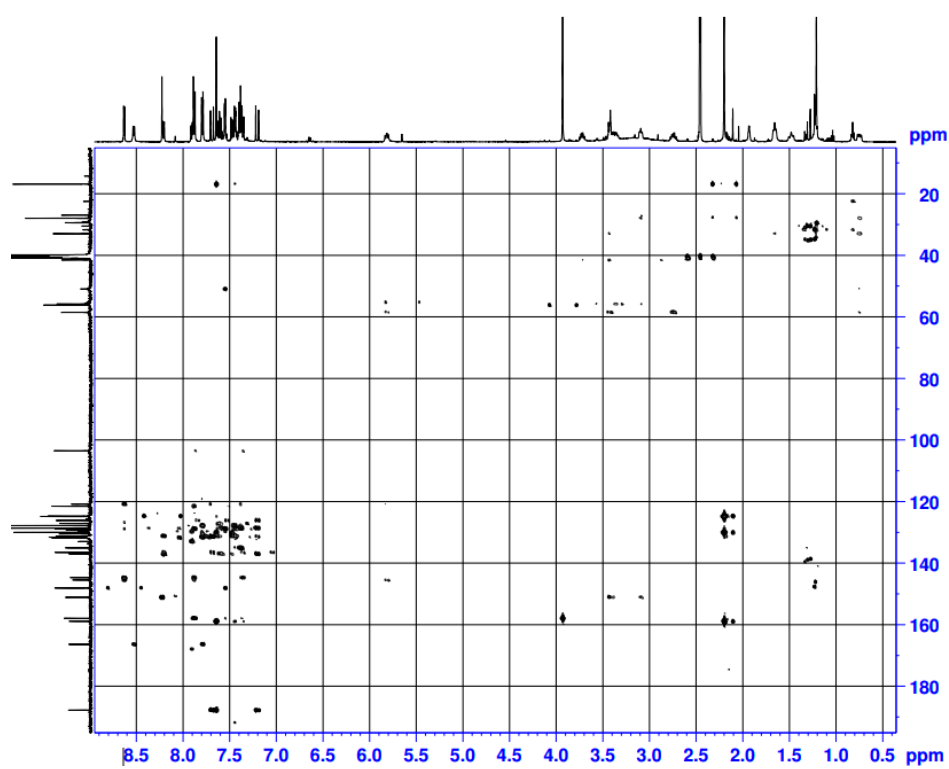

<sup>1</sup>H-NMR of **9d/B** (500 MHz, DMSO-d<sub>6</sub>)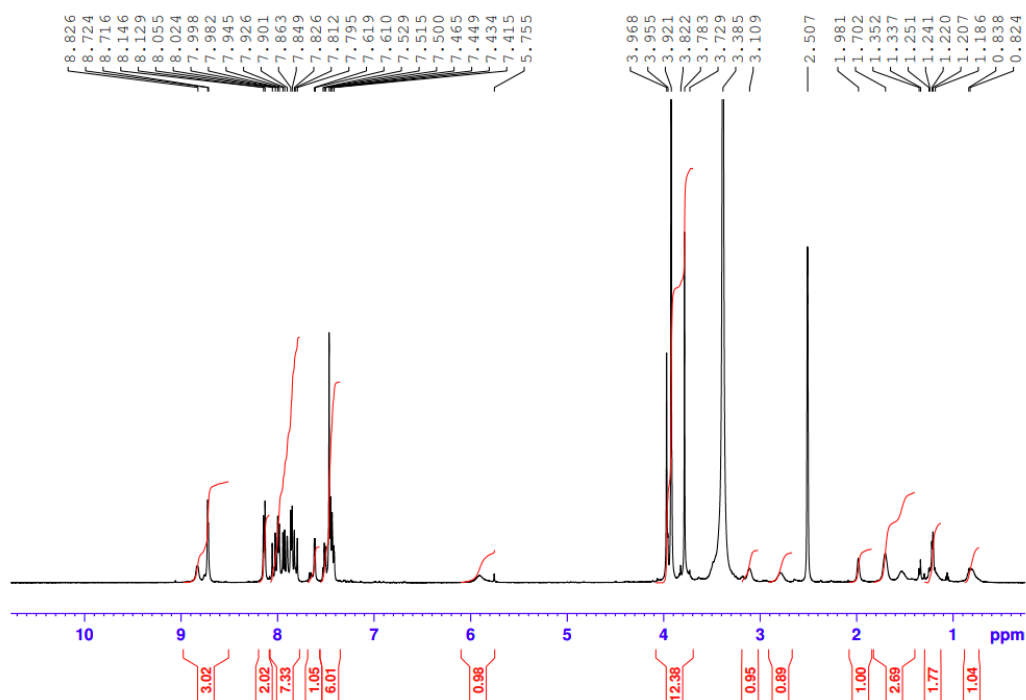<sup>13</sup>C-NMR of **9d/B** (125 MHz, DMSO-d<sub>6</sub>)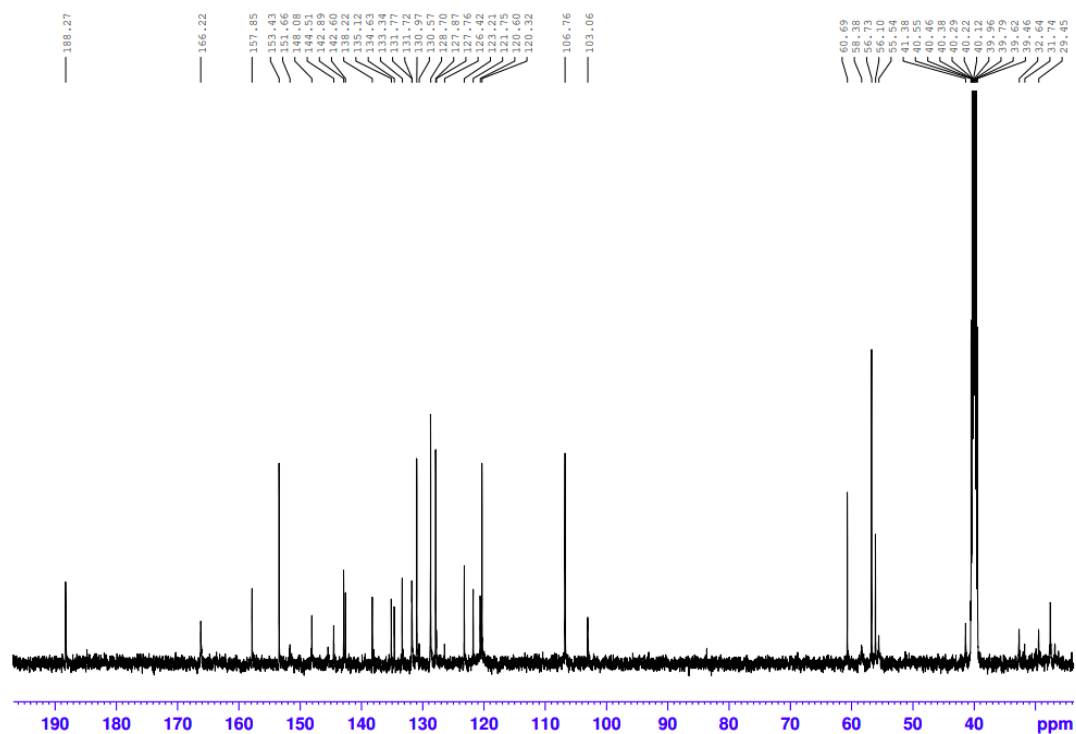

$^1\text{H}$ - $^{13}\text{C}$ -HSQC of **9d/B**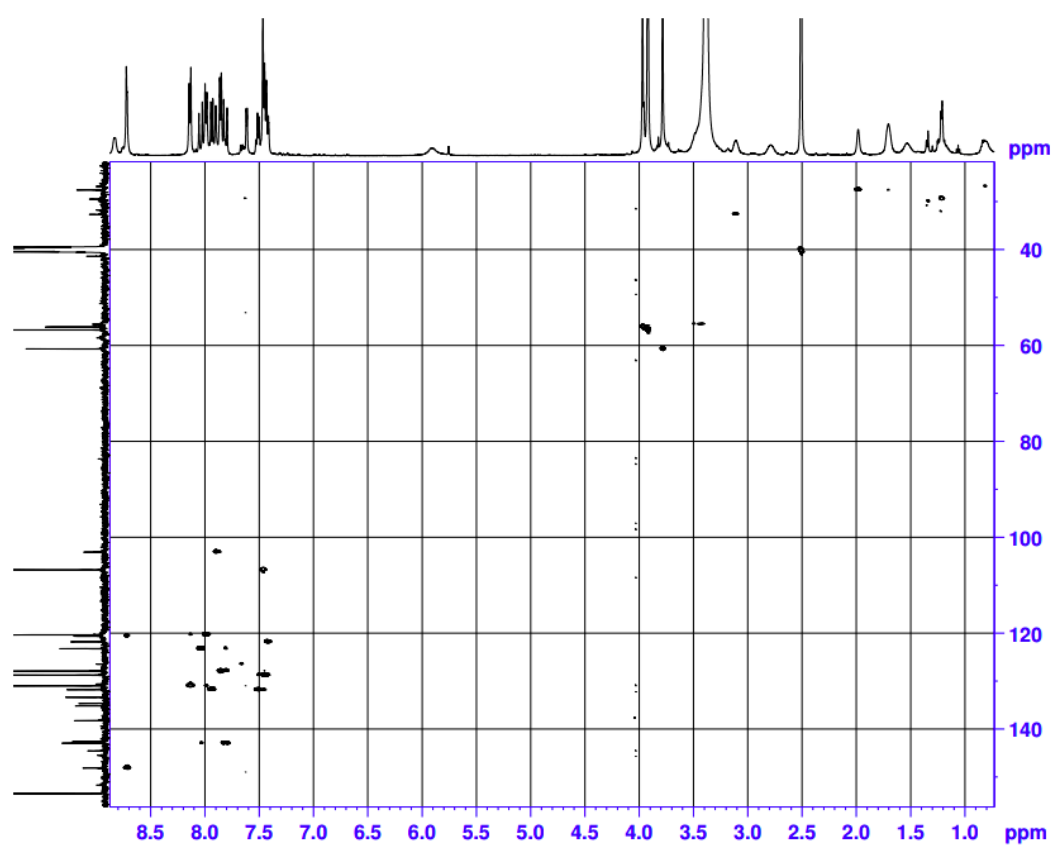 $^1\text{H}$ - $^{13}\text{C}$ -HMBC of **9d/B**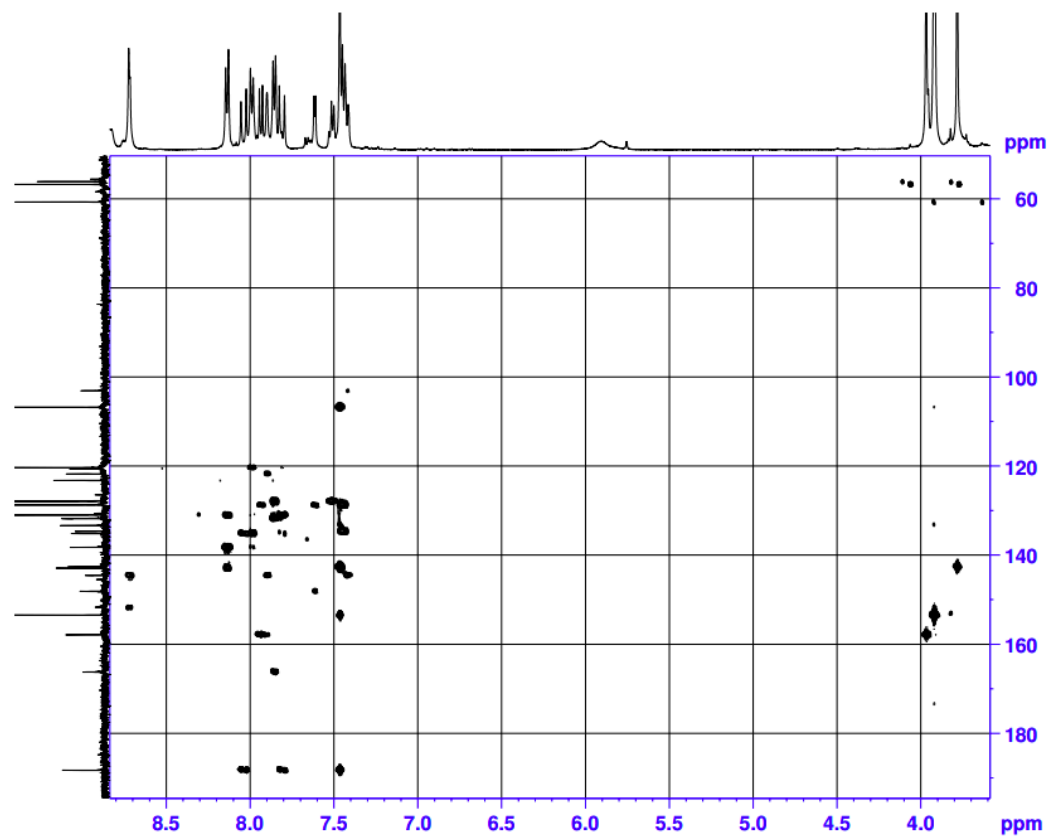

$^1\text{H}$ -NMR of **8/A** (500 MHz,  $\text{DMSO-d}_6$ )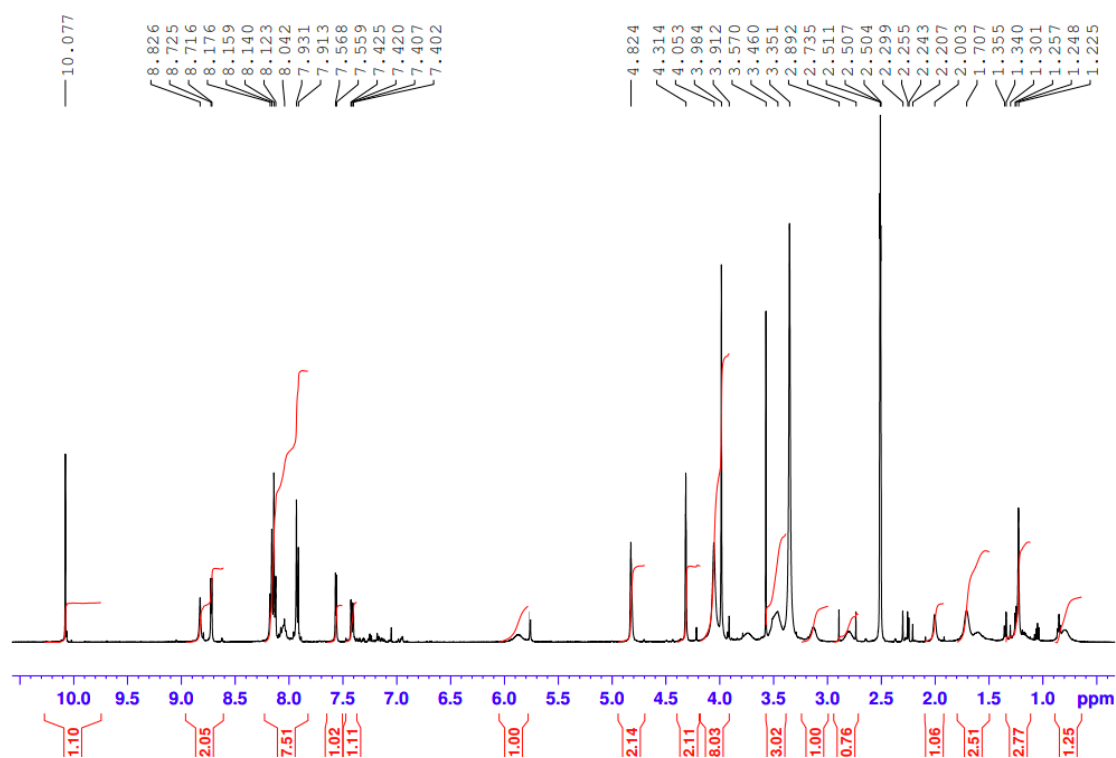 $^{13}\text{C}$ -NMR of **8/A** (125 MHz,  $\text{DMSO-d}_6$ )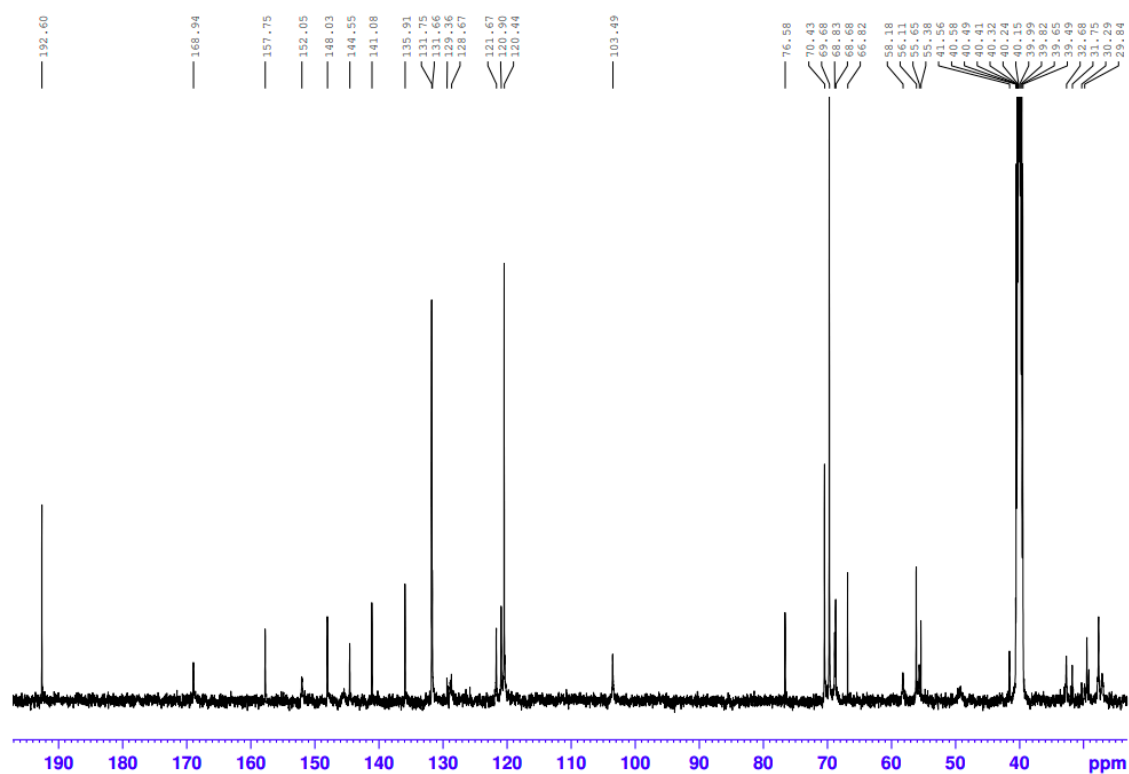

$^1\text{H}$ -NMR of **8/B** (500 MHz, DMSO- $d_6$ )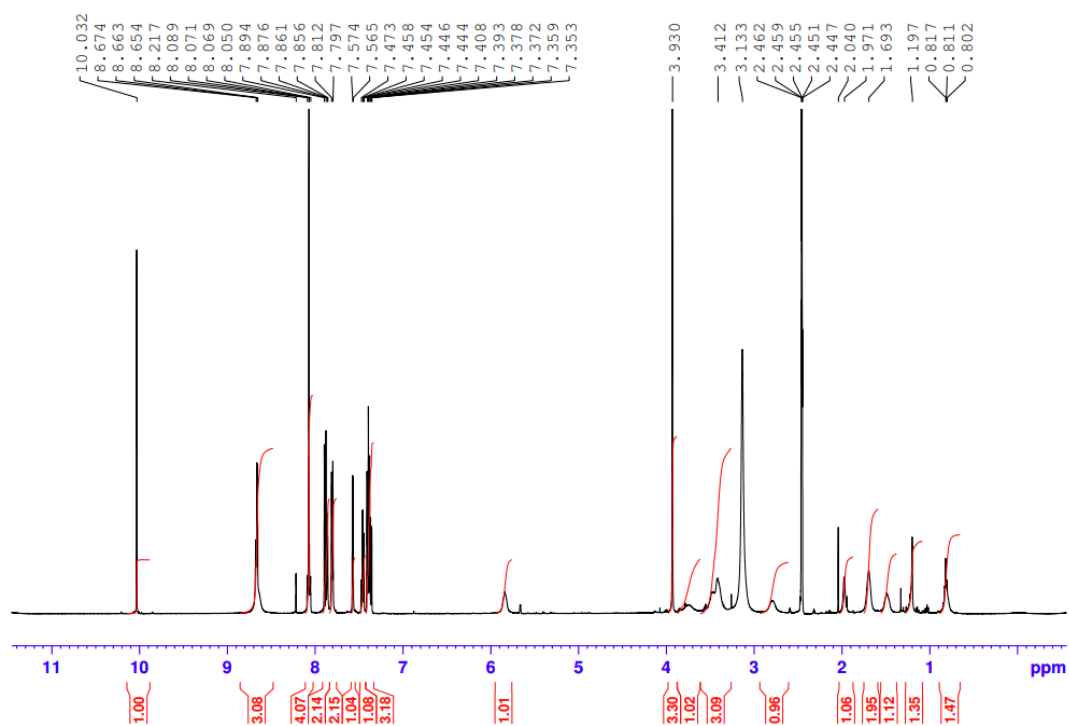 $^{13}\text{C}$ -NMR of **8/B** (125 MHz, DMSO- $d_6$ )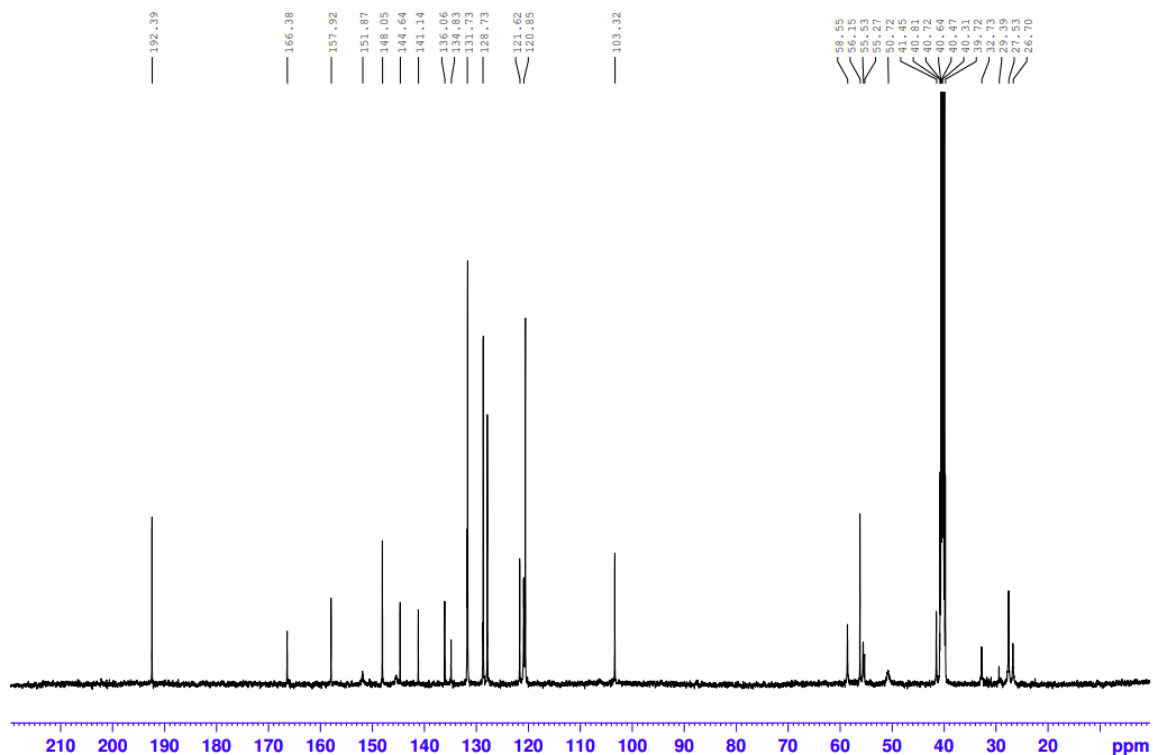

$^1\text{H}$ - $^{13}\text{C}$ -HSQC of **8/B**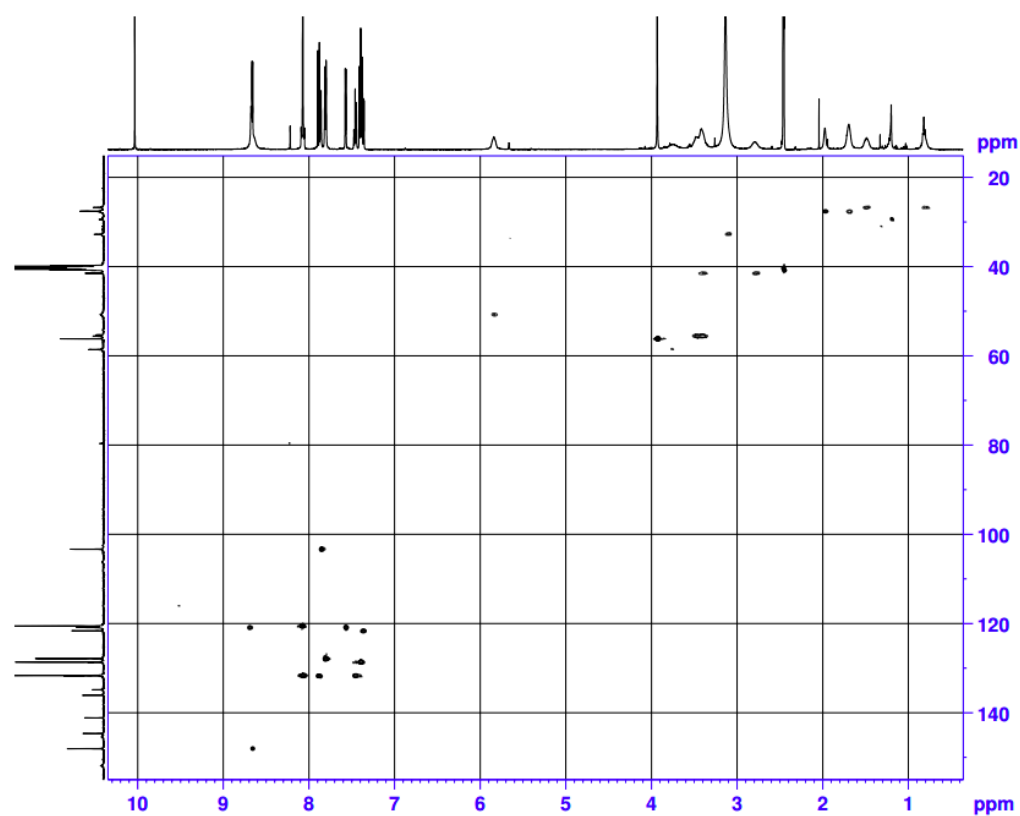 $^1\text{H}$ - $^{13}\text{C}$ -HMBC of **8/B**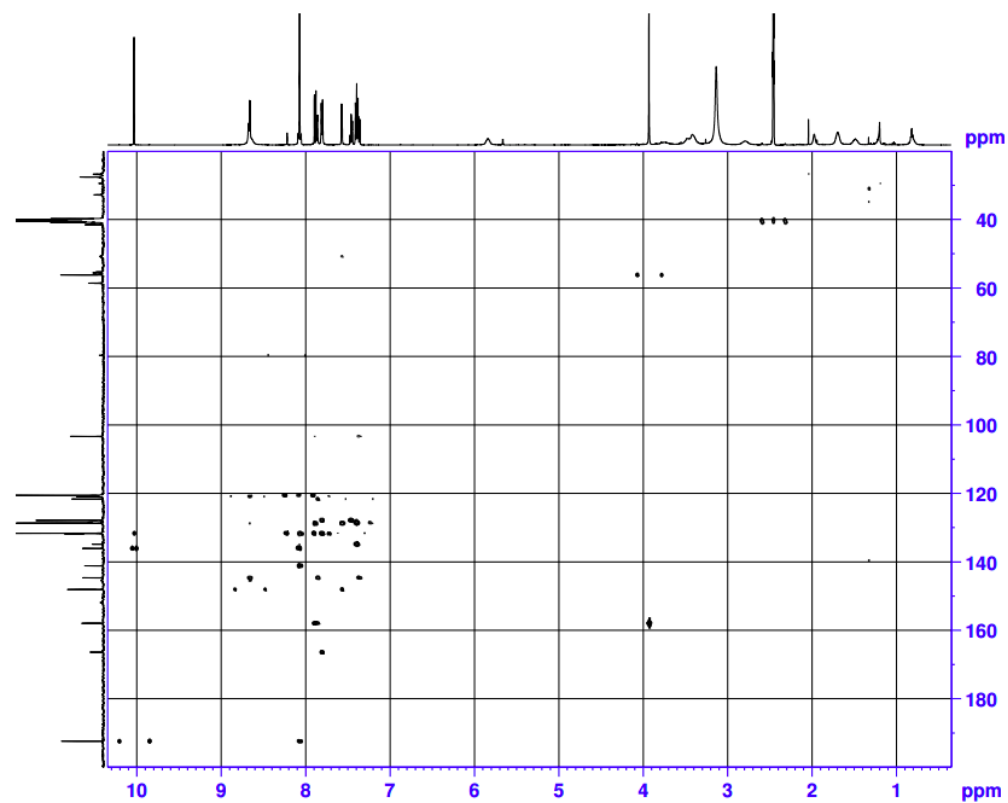

Supplement: s1 [file s1]
